1 **Industry-wide surveillance of Marek's disease virus on**  
2 **commercial poultry farms**

3 Authors: David A. Kennedy<sup>1,\*</sup>, Christopher Cairns<sup>1</sup>, Matthew J. Jones<sup>1</sup>, Andrew S. Bell<sup>1</sup>, Rahel  
4 M. Salathé<sup>1</sup>, Susan J. Baigent<sup>2</sup>, Venugopal K. Nair<sup>2</sup>, Patricia A. Dunn<sup>3</sup>, Andrew F. Read<sup>1</sup>

5 **1 Center for Infectious Disease Dynamics, Departments of Biology and Entomology, The**  
6 **Pennsylvania State University, University Park, PA, USA**

7 **2 Avian Oncogenic Virus Group, The Pirbright Institute, Ash Road, Pirbright, Woking,**  
8 **GU24 0NF, UK**

9 **3 Animal Diagnostic Laboratory, Department of Veterinary and Biomedical Sciences, The**  
10 **Pennsylvania State University, University Park, PA, USA**

11 **\* E-mail: Corresponding [dak30@psu.edu](mailto:dak30@psu.edu)**

12

13

14

15

16

17

18

## 19 **Abstract**

20 Marek's disease virus is a herpesvirus of chickens that costs the worldwide poultry industry over  
21 1 billion USD annually. Two generations of Marek's disease vaccines have shown reduced  
22 efficacy over the last half century due to evolution of the virus. Understanding where the virus is  
23 present may give insight into whether continued reductions in efficacy are likely. We conducted  
24 a three-year surveillance study to assess the prevalence of Marek's disease virus on commercial  
25 poultry farms, determine the effect of various factors on virus prevalence, and document virus  
26 dynamics in broiler chicken houses over short (weeks) and long (years) timescales. We extracted  
27 DNA from dust samples collected from commercial chicken and egg production facilities in  
28 Pennsylvania, USA. Quantitative polymerase chain reaction (qPCR) was used to assess wild-  
29 type virus detectability and concentration. Using data from 1018 dust samples with Bayesian  
30 generalized linear mixed effects models, we determined the factors that correlated with virus  
31 prevalence across farms. Maximum likelihood and autocorrelation function estimation on 3727  
32 additional dust samples were used to document and characterize virus concentrations within  
33 houses over time. Overall, wild-type virus was detectable at least once on 36 of 104 farms at  
34 rates that varied substantially between farms. Virus was detected in 1 of 3 broiler-breeder  
35 operations (companies), 4 of 5 broiler operations, and 3 of 5 egg layer operations. Marek's  
36 disease virus detectability differed by production type, bird age, day of the year, operation  
37 (company), farm, house, flock, and sample. Operation (company) was the most important factor,  
38 accounting for between 12% and 63.4% of the variation in virus detectability. Within individual  
39 houses, virus concentration often dropped below detectable levels and reemerged later. These  
40 data characterize Marek's disease virus dynamics, which are potentially important to the  
41 evolution of the virus.

42 **Keywords:** *Marek's disease virus; surveillance; epidemiology; virulence evolution; vaccine*  
43 *escape*

44 **Abbreviations:** MD – Marek's disease; MDV – Marek's disease virus; DIC – Deviance  
45 information criterion; HVT – Herpesvirus of turkey; qPCR – quantitative polymerase chain  
46 reaction; VCN – virus copy number

## 47 **Introduction**

48 Marek's disease (MD), caused by Marek's disease virus (MDV, *Gallid herpesvirus II*), is an  
49 economically important disease of chickens. Since the development of the first vaccine against  
50 this disease, mass vaccination has been a key feature in sustaining industrial-scale poultry  
51 production (27). MD vaccines are described as “leaky”, because they protect vaccinated hosts  
52 from developing clinical signs of disease, but they nonetheless allow for infection and onward  
53 transmission of the virus (23, 38, 47). This means that the virus can persist and potentially evolve  
54 in vaccinated flocks (39). Nevertheless, very little is known about the distribution of the virus in  
55 the field. Here we surveilled virus across the industry by sampling dust (the infectious vehicle)  
56 from commercial chicken facilities located throughout Pennsylvania from 2012 to 2015. We use  
57 these data to ask where MDV is found, how its prevalence differs across the industry, and how  
58 its concentration changes within flocks over time.

59 MDV is a herpesvirus (9) that is transmitted through inhalation of virus-contaminated dust  
60 (13). Once inside a host, the virus goes through an incubation period of about one week, after  
61 which new virus particles are first shed from feather follicle epithelial cells (3, 22). The shedding  
62 of this infectious virus co-occurs with the shedding of epithelial cells, and so the virus can be

63 found in “chicken dust” (10), a by-product of chicken farming made up of sloughed off epithelial  
64 cells, feathers, fecal material, chicken feed, and bedding material (12). Once shedding is  
65 initiated, it is thought to occur for the rest of the chicken’s life (47).

66 MD was first described over a century ago as a relatively mild polyneuritis condition in  
67 chickens. Over time the disease has increased in severity in unprotected chickens due to altered  
68 rearing conditions and evolution of the virus (31, 39, 46). Two generations of MD vaccines have  
69 been undermined by virus evolution, and this evolutionary trajectory has been well documented  
70 (46). Whether the efficacy of existing vaccine control strategies will decline in the future is an  
71 open question (28), whose answer partially depends on the ecology of the virus. This is because  
72 evolutionary outcomes can vary greatly depending on ecological details, which in this case  
73 depend on where in the industry the evolution is occurring (1, 39).

74 Early efforts to quantify MDV prevalence in the field used serological data to demonstrate  
75 that infection was extremely prevalent (5, 11, 20, 47). Clinical disease and production losses  
76 coupled with these observations motivated near-universal vaccination in commercial poultry  
77 farming in the United States and many other nations. More recently, virus prevalence has been  
78 inferred from condemnation data (26, 34, 45) and questionnaires (15), but the reliability of these  
79 methods are limited by changes in disease and perception of disease that may occur irrespective  
80 of virus dynamics (26). The development of quantitative polymerase chain reaction (qPCR)  
81 protocols specific for MDV have made it possible to detect and quantify virus collected from  
82 field settings (2, 3, 21). Four studies have used qPCR methods to study field samples to study  
83 virus dynamics in Australia (17, 37, 44) and Iraq (43). There are many differences in chicken and  
84 egg production between these countries and the United States, perhaps most notably that

85 vaccination is nearly universal among commercial farms in the United States (44). Here we  
86 performed quantitative polymerase chain reaction (qPCR) on samples collected from chicken  
87 farms throughout Pennsylvania, USA, to directly examine MDV dynamics on commercial  
88 poultry farms. The farms used in our study encompass much of the diversity of industrial-scale  
89 commercial chicken-meat and egg production.

90 Commercial poultry farming is highly structured (fig. 1). Industrialized commercial chicken  
91 production is broadly divided into egg laying birds, broiler birds, and layer-breeder or broiler-  
92 breeder birds. Each have potentially different natural histories, genetics, and management  
93 practices. Further structure exists within these production types, because of differing  
94 management practices between operations (companies), for example from targeting particular  
95 sectors of the poultry market (e.g. kosher, organic, live bird market, cage-free eggs, etc.), or by  
96 sharing biosecurity practices, equipment, and feed mills. Within an operation the behaviors of the  
97 people who manage the birds on the farm could in turn affect virus dynamics. Within single  
98 farms, there are usually multiple houses. Within these houses, there are successive flocks of  
99 birds. Our goal was to quantify the relative importance of these factors on the variation we  
100 observed in the prevalence of MDV. This is a critical first step in evaluating risk factors both for  
101 disease outbreaks, and for virus evolution that might undermine current vaccine strategies and  
102 lead to increased pathogen virulence.

## 103 **Methods**

## 104 **Background**

105 Pennsylvania has commercial scale production of both chicken meat and eggs. Most broiler  
106 flocks follow an all-in, all-out approach. Some, however, especially farms rearing colored breeds  
107 have multiple ages per premises, while maintaining all-in, all-out practices for individual houses.  
108 Down time is typically at least one week, but can range from as little as one day to in excess of  
109 several weeks. Most of these farms are cleaned out completely during this down time between  
110 flocks, and the farms typically do not re-use litter. Breeder flocks use all-in, all-out approaches  
111 for each house with cleaning and disinfecting before new birds are placed. Nevertheless, some  
112 have multiple ages on single premises in different houses. Caged layers are typically reared on  
113 multi-house complexes, where each house follows an all-in all-out system with cleaning and  
114 disinfecting between flocks. Different houses, however, remain populated with different aged  
115 birds to achieve continuous egg production. Floor layers are typically reared on premises with  
116 one house and one age of bird, or two houses usually of different age from each other. Each  
117 house typically follows an all-in, all-out approach with cleaning and disinfection before  
118 restocking.

119 Three live vaccine virus strains are used on Pennsylvania farms to control MD: HVT, SB-1, and  
120 Rispens. These strains are related but not identical to wild-type virus. Once vaccinated, a bird  
121 can shed these vaccine strains ([3](#), [22](#)), and so we used the primer-probe combination of Baigent  
122 et al. ([2](#)) that is capable of quantifying wild-type virus in the presence of each of the vaccine  
123 strains. This specificity is necessary because almost all chickens in Pennsylvania reared for  
124 commercial production are vaccinated against MD. Broiler chickens are typically vaccinated  
125 using a combination of HVT and SB-1, although Rispens vaccine virus is used under some  
126 circumstances. Egg laying chickens and broiler-breeder chickens are typically given Rispens  
127 vaccination, often in combination with HVT and/or SB-1. This was confirmed in our samples

128 through the detection of the Rispens vaccine virus in at least some dust samples from each of  
129 these operations. In Supplement [A.1](#), we show that HVT and SB-1 detection in dust is  
130 uncorrelated with wild-type virus detection, and that Rispens vaccine virus is negatively  
131 correlated with wild-type virus detection.

## 132 **Sample collection**

133 The dust that collects on fan covers, or “louvers”, shows less spatial variation in virus  
134 concentration than dust that collects on ledge-like surfaces (Supplement [A.2](#)), and so samples  
135 used in this study were collected by scraping dust from fan louvers. Logistical constraints  
136 including those imposed by biosecurity concerns, industry participation, total availability of  
137 farms, and time-varying presence of chicken cohorts resulted in a sampling schedule best  
138 described formally as haphazard rather than random. Given these constraints, we visited and  
139 collected dust from as many different farms as possible to gain insights into whether and where  
140 the virus was detectable. A summary of our sample sizes is available in [fig. 1](#). Between two and  
141 six samples were collected from each house during each visit. In total, we visited 104 unique  
142 commercial combinations of farm and operation (three farms changed operations during  
143 surveillance). These combinations were comprised of 29 broiler-breeder facilities, 52 broiler  
144 facilities, and 23 egg-laying facilities (no egg-breeder facilities were included). On five broiler  
145 farms where high concentrations of virus were detected, we collected at approximately weekly  
146 intervals to quantify changes in virus concentration over time (hereafter referred to as the  
147 “longitudinal data”). Each of these five farms was visited between 48 and 133 times (mean 98.4).  
148 This subset of data includes 3727 samples, collected across 149 flocks, reared in 14 houses on  
149 five farms representing 4 operations ([fig. 1](#)). We quantified MD prevalence using all fan dust

150 samples with the exception of those from these five farms and 103 other samples for which bird  
151 age was unavailable. We refer to this subset of data as the “cross-sectional data.” This subset is  
152 comprised of 1018 samples, collected from 297 flocks, reared in 192, located on 90 farms,  
153 belonging to 13 operations, with 3 production types (fig. 1). All fan dust samples collected  
154 during this study are being stored indefinitely at -80 °C.

155 On two of the farms included in the longitudinal data study, we also collected data on  
156 airborne virus concentration and host infection status. Airborne virus concentration was assessed  
157 by securing six 1.5 ml centrifuge tubes to the arms, hips, and legs of two of the authors during  
158 routine dust collection. Tubes were oriented horizontally with tops pointing to the front of the  
159 collector’s body, opened upon entering the house and closed upon leaving. This period lasted  
160 approximately fifteen to twenty minutes. These data are hereafter referred to as the “air tube  
161 data.” They are comprised of 609 samples, from 15 flocks, reared in 4 houses, on 2 farms,  
162 associated with 2 operations (fig. 1). Both farms reared broiler chickens. Feathers were also  
163 collected from individual birds on these same farms as follows. Two feathers were plucked from  
164 the breast of each target bird. The pulpy proximal end of each feather was clipped and placed  
165 into its own centrifuge tube. Scissors used to clip feathers were cleaned between birds using 70%  
166 isopropyl alcohol wipes. Ten total birds were sampled from each house during each visit  
167 (hereafter referred to as the “feather tip data”). Target birds for feather collection were chosen  
168 such that they were spatially distributed throughout the house. Individual birds were selected at  
169 the discretion of the collector with a goal of random selection. To account for the possibility of  
170 airborne virus contamination, we also had two control tubes, one that was left open during the  
171 collection of a single feather from a single bird, and one that was left open during the collection  
172 of feathers from all ten birds. These control tubes are distinct from the air tube samples, which



173 were collected immediately before feather samples. In total, we tested 2003 feathers, from 20  
174 flocks, and 4 houses (fig. 1). Feather sampling was approved by the Institutional Animal Care  
175 and Use Committee of The Pennsylvania State University (IACUC Protocol#: 46599)

## 176 **qPCR**

177 All samples were brought back to the lab and stored at 4 °C prior to processing. Detailed  
178 methods regarding DNA extraction and qPCR can be found in Supplement [A.3](#). Dust samples  
179 collected from fans were processed in duplicate using a modified version of the protocol of  
180 Baigent et al. ([2](#)). Methods were similar for air tube and feather tip samples, but these samples  
181 were processed in singlicate. DNA for all samples were captured in a final elution volume of 200  
182  $\mu$ l, and 4  $\mu$ l of this undiluted elution were used in each qPCR reaction.

## 183 **Statistical analysis**

### 184 **Analysis of the cross-sectional data**

185 All analyses were performed in the R statistical computing language ([36](#)). To study the variation  
186 in the presence and absence of MDV across chicken dust samples, we treated our qPCR data as  
187 binomial data on a logit scale with those qPCR runs that had at some point crossed the qPCR  
188 fluorescence threshold treated as positive outcomes, and those that had not treated as negative  
189 outcomes. This method was similar in effect to running a traditional PCR and checking for the  
190 amplification of a target using gel electrophoresis. In practice, our limit of detection was  
191 approximately 100 template DNA copies per mg of dust (Supplement [A.4](#)), which is close to the  
192 concentration of virus that would be expected if about 20 to 50 chickens were infected per flock

193 of 30,000 chickens and virus was randomly mixed throughout the dust (Supplement [A.5](#)).

194 Feather tip data were similarly treated as binomial data (Supplement [A.6](#)).

195 We analyzed the data using Bayesian generalized linear mixed effects models ([7](#), [16](#), [18](#)).

196 Justification for the modeling choices below can be found in Supplement [A.7](#). Our analysis was

197 performed using the function ‘MCMCglmm’ ([18](#)) with family set to “categorical”, and “slice”

198 sampling. Depth of coverage ranged from 1 to 90 dust samples, with a median of 6 (fig. [2](#)).

199 Models included random effects for “Operation”, “Farm”, “House”, “Flock”, and “Sample” to

200 account for these levels of clustering in the data. For example, including an effect of “Sample”

201 allowed us to distinguish between technical and biological variation in virus detection. For each

202 random effect, we used inverse Wishart priors with scale 5 and degrees of freedom 3

203 (Supplement [A.8](#)). Models also included fixed effects of “Production type”, “Collection date”,

204 and “Bird age”. For each fixed effect, we used univariate normal priors with mean 0 and standard

205 deviation 7 (Supplement [A.8](#)). Production type was fit as a categorical factor with levels

206 “broiler”, “broiler-breeder”, and “layer”. Collection date was fit as two continuous factors, one

207 the sine and one the cosine of  $2\pi/365$  times the calendar day that a sample was collected, to

208 capture seasonal variation ([26](#)). Bird age was fit as a categorical factor using a spline with knots

209 at cohort ages of 21, 42, 100, and 315 days ([19](#)). The spline was generated using the ‘bs’ function

210 in the package “splines”. We generated five candidate models consisting of the full model that

211 contains all of the factors listed above, the three models that lacked exactly one of these fixed

212 effects, and one model that lacked the random effect of “Sample”. We explored the importance

213 of the other random effects by examining the magnitude of their estimated effect sizes.

214 We ran each model for  $4.1 \times 10^6$  iterations with a burn in of  $1 \times 10^5$  steps, and a thinning  
215 interval of  $2 \times 10^3$ . This resulted in 2000 parameter samples for each model run. This process  
216 was repeated to generate a total of three chains for each model. Posterior convergence was tested  
217 in three steps, following Kennedy et al. (25). The models were then compared using the  
218 Deviance Information Criterion (DIC). DIC is a tool, in many ways similar to the Akaike  
219 Information Criterion (AIC), that is useful for comparing the relative goodness of fit of various  
220 models (42). To foster model comparison, we presented  $\Delta$ DIC scores, which are the differences  
221 in DIC between the best model and each alternative model. Like AIC, there is no precise  
222 threshold for significance of  $\Delta$ DIC scores, but Bolker (6) argued that it is on the same scale as  
223 AIC. We therefore followed the suggested rule of thumb for AIC (8) that  $\Delta$ DIC scores less than  
224 2 suggest substantial support for a model, scores between 3 and 7 indicate considerably less  
225 support, and scores greater than 10 suggest that a model is very unlikely.

226 We also explored the importance of model factors using fraction of variance explained ( $R^2$ )  
227 where the calculation of  $R^2$  was modified for use with generalized linear mixed models (29). We  
228 presented marginal  $R^2$  and conditional  $R^2$  values that describe the fraction of variance on the  
229 latent scale of the data that can be attributable to fixed and fixed plus random effects,  
230 respectively. We then extended this method to explore the contribution to  $R^2$  that can be  
231 attributed to each single factor in the model. Credible intervals for all estimates came from the  
232 posterior distributions of the fitted models.

233 We explored the statistical significance of differences between production types by  
234 performing pairwise comparisons on the estimated effect sizes of production type. In practice,  
235 this was done by asking what fraction of samples from the posterior estimated a larger effect size

236 for production type level 1 than for production type level 2 or the reverse. This value was  
237 multiplied by two to account for it being a two-tailed hypothesis test. These tests were performed  
238 for all three pairwise comparisons between broiler-breeders, broilers, and layers.

239 Previous work has shown that MD associated condemnation rates historically varied across  
240 broad geographic area such as between states ([26](#)). We explored whether there was evidence of  
241 clustering in virus detection across the finer spatial scales found in our cross-sectional data. We  
242 did this by calculating distances and correlations in effect sizes between each pairwise farm  
243 location. We then used the ‘lm’ function to generate two models. The first was an intercept only  
244 model that functioned as a null model. The second was an intercept plus distance effect model,  
245 where distance was transformed by adding one and then taking the  $\log_{10}$ . The importance of  
246 distance was assessed by performing a likelihood ratio test.

#### 247 **Analysis of the longitudinal data**

248 To study the variation in MDV dynamics within a focal chicken house over time, we used the  
249 quantitative values returned by qPCR analysis, rather than the presence-absence used for the  
250 cross-sectional data, because the quantitative data are more sensitive to changes in virus  
251 concentration. We assumed lognormal error in these quantities, because variation in qPCR data  
252 tends to occur on a log scale (40). In our analyses, we therefore transformed the virus-copy-  
253 number-per-mg-of-dust data by adding one and  $\log_{10}$  transforming that value. We explored the  
254 suitability of this lognormal assumption for our data in Supplement [A.9](#). For samples with virus  
255 concentrations below our limit of detection, we performed our analyses while treating these data  
256 in two different ways, first as a value of zero virus copies representing virus absence, and second  
257 as a value of our limit of detection representing virus presence at an undetectable level. Our limit

258 of detection was generally better than 100 virus copies per mg of dust (Supplement [A.4](#)), and so  
259 in practice, we used this quantity as our value in the latter case. For this analysis, all samples that  
260 had detectable virus below this quantity were treated identically to negative samples.

261 We sampled from five broiler farms at approximately weekly intervals. One of our main  
262 goals was to quantify how virus concentrations changed over the duration of a cohort, and across  
263 different cohorts, and so we began by merely plotting the data. A similar plot was generated for  
264 the air tube data. We then explored a cohort age effect by fitting smoothing splines to the raw  
265 data from each farm where the data are sorted by cohort age. Each spline was fit using the  
266 function ‘smooth.spline’. We used the option “nknots=4” for this function because this was the  
267 smallest number of knots that did not return an error. Very similar conclusions were obtained  
268 using any number of knots from four to nine. We explored seasonality in these data by  
269 subtracting cohort age effects from the raw data and plotting the residual virus concentration. We  
270 assessed the degree of correlation between houses within farms using the ‘cor’ function. We also  
271 examined autocorrelations within houses using the ‘acf’ function for data within each house.

## 272 **Results**

### 273 **Cross-sectional data**

274 Summary statistics characterizing the data used for our model comparisons are shown in fig. 2.  
275 Among all samples collected (combining cross-sectional and longitudinal data), wild-type MDV  
276 was detected at least once on 36 of the 104 farms (fig. [3](#)). Virus was detected in 1 of 3 broiler-  
277 breeder operations, 4 of 5 broiler operations, and 3 of 5 egg layer operations. The fraction of  
278 samples in which virus was detectable varied substantially among farms with detectable virus,

279 and less so between houses within a farm (fig. [3](#)). Summary plots of virus prevalence as a  
280 function of production type, bird age, date of sample collection, and bird sex can be found in  
281 Supplement [A.10](#). Note, however, that a visual inspection of patterns in these data could be  
282 misleading because of potential confounding with other covarying factors. We therefore used  
283 statistical models to further explore the effects of these factors on the data.

284 Our analysis of the virus prevalence data using DIC scores revealed that our best model was  
285 our most complicated model, which included effects of production type, bird age, collection date,  
286 and variation between dust samples (Table [1](#)). Comparing our most complicated model to the  
287 other models through  $\Delta$ DIC, we found moderate support for an effect of production type,  
288 reasonable support for an effect of collection date, relatively strong support for an effect of bird  
289 age, and overwhelming support for variation between dust samples. Taken together these results  
290 suggest that, to varying degrees, each of these factors had detectable effects on the prevalence of  
291 MDV on farms.

292 We further explored the importance of these effects by examining the fraction of variance in  
293 our data explained by each model factor for our best model (fig. [4](#)). This showed that the fraction  
294 of variance attributable to production type was highly uncertain, with the 95% credible interval  
295 ranging from 1.5% to 38.4%.

296 The effect sizes of production type, bird age, and collection date observed in the full model  
297 are shown in fig. 5. Virus prevalence was higher on broiler farms than on layer farms ( $p = 0.02$ ),  
298 but there was no statistically significant difference between breeder and broiler ( $p = 0.27$ ), or  
299 breeder and layer farms ( $p = 0.15$ ). During the first few weeks of a bird cohort the probability of  
300 detecting virus decreased, and then as birds continued to age this probability began to increase.

301 Note that after cohorts reached about 100 days, the median effect was close to neutral and the  
302 confidence intervals on the effect size were fairly large (fig. [5](#) middle panel). This uncertainty  
303 was likely because we have relatively few data from older cohorts. We additionally saw a  
304 seasonal pattern in MDV prevalence with a fairly wide credible interval. Our probability of  
305 detecting virus was lowest in the winter months and highest in the summer months (fig. [5](#) bottom  
306 panel).

307 Additionally, we found that the estimated effect that “Farm” had on virus detection tended to  
308 be positively correlated for nearby farms, and this correlation decayed with distance between  
309 farms ( $\chi^2 = 28.5$ ,  $d.f. = 1$ ,  $p < 0.001$ ). However, the effect size was relatively small, with a  
310 maximum estimated correlation of  $0.029 \pm 0.004$  that decayed by  $0.014 \pm 0.003$  with every  $\log_{10}$   
311 increase in distance. Moreover, this correlation with distance might have been a statistical  
312 artifact resulting from geographic clustering of farms belonging to the same operation: no  
313 significant correlations by distance were detected between farms within single operations.

#### 314 **Longitudinal data**

315 The longitudinal data from five broiler farms revealed several patterns. These data visually  
316 confirmed the conclusion from the cross-sectional data that virus densities varied substantially  
317 between farms, and between flocks, but varied less between houses located on the same farm  
318 (figs. [6](#) and [7](#)). This similarity between houses was also seen as a correlation of virus quantities  
319 between houses within farms (average correlations between houses within each of the five farms  
320 were 0.215, 0.320, 0.738, 0.763, and 0.918). The data also confirmed the observation that virus  
321 densities tended to decrease during the early phase of a cohort, and tended to increase during the  
322 later phase of a cohort (Supplement [A.11](#)). This created “U” shaped curves in virus concentration

323 within cohorts (figs. [6](#) and [7](#)). This pattern is not explained by differences in sample humidity or  
324 qPCR inhibition (Supplement [A.12](#)). Consistent with the cross-sectional data in which seasonal  
325 effects were small, we were unable to find any consistent seasonal effect on MDV dynamics in  
326 these data.

327 Three additional patterns were also detectable in the longitudinal data. First, virus  
328 concentrations often dropped to below detectable levels, and returned to detectable levels at a  
329 later time point (figs. [6](#) and [7](#)). Second, there was an autocorrelation in virus concentration within  
330 single houses over time. This effect was seen as an autocorrelation between samples collected  
331 seven days apart ( $\text{Acf}(7)_{\text{avg}} = 0.579$ ,  $\text{Acf}(7)_{\text{min}} = 0.226$ ,  $\text{Acf}(7)_{\text{max}} = 0.967$ ), although this  
332 correlation was also observed over longer periods (Supplement [A.13](#)). Third, during farm down  
333 time, when birds were absent from houses, there were many cases where virus concentration did  
334 not change (figs. [6](#) and [7](#)). Patterns consistent with the first two of these observations were also  
335 seen in the air tube and feather tip data (fig. [8](#)).

## 336 **Discussion**

337 We surveyed commercial chicken farms in Pennsylvania to generate the first industry-wide  
338 dataset exploring the prevalence of this virus in modern commercial settings. We found that the  
339 virus was detectable on only one third of farms, that bird age, collection date, and production  
340 type affected the probability that we detected virus, and that the vast majority of variation in the  
341 data was not attributable to those factors, but instead was attributable to differences between the  
342 companies, farms, houses, flocks and samples. Longitudinal sampling on five focal broiler farms  
343 revealed substantial autocorrelation in virus density within houses over time, and demonstrated  
344 that virus concentrations often dropped to undetectable levels on farms but reappeared in future



345 flocks. Taken together, these results show that the virus can be found throughout the  
346 heterogeneity of the poultry and egg industry.

347 Despite the differences in rearing practices between the United States, Australia and Iraq, the  
348 overall prevalence of MDV detection in dust samples was broadly in agreement with studies  
349 performed in these other countries ([17](#), [37](#), [43](#), [44](#)) showing virus on only a subset of farms. Like  
350 Walkden-Brown et al. ([44](#)), we found that MDV concentration in dust increased in broiler flocks  
351 as birds aged. Two Australian studies examined the link between HVT and MDV concentration  
352 in dust. One study found no correlation ([17](#)) and the other showed a negative correlation ([44](#)).  
353 Our results agreed with the former study. All flocks in our study, however, were vaccinated,  
354 limiting the variation in vaccination status of our study relative to the studies performed in  
355 Australia where vaccination is not universal. One striking difference between our conclusion and  
356 that of Groves et al. ([17](#)), was our finding that operations have vastly different levels of MDV  
357 prevalence. Groves et al. ([17](#)) found no effect of operation. It may be that the importance of  
358 operation is specific to poultry farming in the United States.

359 Previous studies on the evolution of MDV in the poultry industry have focused entirely on  
360 endemic virus persistence in broiler chicken houses ([1](#), [39](#), [41](#)). Our data, however, reveal that  
361 the virus can be found in each of the sectors of chicken farming, including broiler, layer, and  
362 breeder chicken facilities. The assumption of these models, that virus evolution can be  
363 understood using the host genetics, rearing duration, host densities, vaccination strategies, and  
364 biosecurity measures employed in the rearing of broiler chickens alone therefore might be  
365 misleading. Given the potential for vastly different evolutionary outcomes under different

366 ecological assumption, further investigation is needed to determine where evolution is likely  
367 strongest.

368 Conventional wisdom is that MDV is sufficiently pervasive that it should be considered  
369 ubiquitous ([14](#), [30](#), [33](#)). This idea came from observations that the virus is highly stable in the  
370 environment ([24](#)), that problems with MD can occur quickly and without warning when there are  
371 issues with vaccine administration, and that vaccination does not preclude infection with and  
372 transmission of the virus ([22](#), [35](#), [38](#)). It was further supported by the historical ubiquity of  
373 antibody detection in production flocks ([5](#), [11](#), [20](#), [47](#)). However, we found virus on only one  
374 third of farms. It may in fact be present on the other two thirds of farms at densities below our  
375 detection threshold or at times when samples were not collected, or it may instead be that  
376 modern farm practices have led to changes in the distribution of the virus such that it is no longer  
377 ubiquitous on chicken farms. Many features of poultry farming have changed in recent decades  
378 that could have altered MDV ecology, such as vaccination strategies and cohort durations  
379 ([26](#), [41](#)). Recent studies in Australia ([37](#), [44](#)), and Ethiopia ([4](#)) have suggested that MDV may no  
380 longer be ubiquitous in those locations. Our study suggests that this trend may be more general,  
381 extending to commercial poultry farming the United States. Introducing non-vaccinated sentinel  
382 birds could be a way to directly challenge this finding. If confirmed, this suggests that selective  
383 forces acting during sporadic outbreaks or acting in flocks with low prevalence of infection may  
384 play an important role in the evolution of the virus.

385 The importance of random effects (i.e. operation, farm, house, flock, and sample) in  
386 explaining the data suggests that substantial variation in virus dynamics are explained by factors  
387 that co-vary with these random effects. For example, bird breeds, vaccination details, and

388 average cohort durations may explain some of the variation between operations. Ventilation  
389 rates, clean out efficiency, and other hygiene factors may explain some of the variation between  
390 farms. Structural differences and wind patterns may explain some of the variation between  
391 houses. Microbial communities, developmental plasticity and stochastic effects of virus  
392 transmission may explain some of the variation between flocks. Lastly, spatial clustering of virus  
393 may explain some of the variation between samples. Our model analysis showed that between  
394 about one quarter and three quarters of the variation in MDV detection probability was  
395 attributable to the combined effect of production type and operation. However, we are unable to  
396 parse these effects into more specific factors such as hygiene, barn design, ventilation,  
397 temperature, or vaccine manufacturers. This is because these factors strongly covary with factors  
398 such as production type and operation. For example, all layer and broiler-breeder farms used  
399 Rispens vaccination, and almost all broiler farms used bivalent vaccination. Nevertheless, our  
400 results suggest that factors outside the control of individual farm operators may play a large role  
401 in MDV dynamics. It also suggests that any intervention strategy intended to control virus is  
402 likely to be ineffective unless implemented through changes in operation practices or policies.

403 The large degree of uncertainty in the effect sizes of production type and operation likely  
404 resulted from correlations in these estimates (Supplement [A.14](#)), and this correlation may explain  
405 why support for an effect of production type was only moderate. Indeed, exploring the variance  
406 explained by these two factors combined, we found that they accounted for between 26.7% and  
407 74.4% of the variance. This parameter estimation difficulty likely occurred because these factors  
408 covary in our study area.

409 The observation that seasonality explained only a small portion of variance in MDV  
410 prevalence contrasts with observations that MD associated condemnation in broiler chickens has  
411 had clear seasonal patterns in the past ([44](#), [45](#)). However, seasonal patterns in condemnation  
412 have become less pronounced in recent years ([26](#)). The data we report here are consistent with  
413 the theory that this decrease in seasonality is attributable to an overall decline in prevalence,  
414 resulting in stochastic outbreaks playing a relatively larger role in dynamics than seasonal  
415 forcing ([26](#)).

416 The “U” shaped pattern in virus dynamics within a flock, seen both in the longitudinal and  
417 cross section data, suggests that MDV density in dust changes predictably over time. The initial  
418 decrease might be explained either by a dilution of virus in dust early in cohorts when birds shed  
419 virus-free dust into dust that remained from the previous cohort, or by degradation of virus DNA  
420 early in flocks. The subsequent increase could then be explained by the hyper-concentration of  
421 virus in dust as cohorts aged, when birds were shedding dust that was highly contaminated with  
422 virus.

423 In this study, the majority of data were collected from dust samples scraped from surfaces.  
424 An alternative method would have been the use of settle plates that collect dust as it settles out of  
425 the air. Both methods introduce biases, but we opted for the former method to avoid spatial  
426 artifacts that might have arisen from patterns of dust flow. Our measurements of virus  
427 concentration showed little evidence of spatial heterogeneity (Supplement [A.2](#)). Perhaps the  
428 largest drawback of our method was that each sample of dust potentially contained material that  
429 might even predate the current flock of birds in the house. The dust kinetics might therefore be  
430 dampened relative to their true kinetics in the air. However, the strong agreement in viral kinetics

431 between these data, and both the air tube and feather tip data suggest that this is may be more of  
432 a theoretical rather than practical concern.

433 An interesting question is whether virus populations are persisting within individual houses  
434 and farms, or instead going through repeated extinction and recolonization events. Our  
435 observation in the longitudinal data that there was a strong autocorrelation in virus concentration  
436 within houses over time (Supplement [A.13](#)) contrasted with the observation that virus densities  
437 were often undetectably low in one cohort but emerged as detectable in the next (figs. [6](#) and [7](#)).  
438 This reemergence might be due either to recolonization events or to the epidemiological  
439 amplification of virus persisting within the house at undetectable concentrations. Recently  
440 developed genetic sequencing techniques ([32](#)) could be used to determine the relative  
441 contributions of these two factors.

442

## 443 **References**

- 444 1. Atkins, K. E., A. F. Read, N. J. Savill, K. G. Renz, A. F. M. Islam, S. W. Walkden-  
445 Brown, and M. E. J. Woolhouse. Vaccination and reduced cohort duration can drive  
446 virulence evolution: Marek's disease virus and industrialized agriculture.  
447 *Evolution* 67:851–860. 2013.
- 448 2. Baigent, S. J., V. K. Nair, and H. Le Galludec. Real-time PCR for differential  
449 quantification of CVI988 vaccine virus and virulent strains of Marek's disease virus. *J.*  
450 *Virology Methods* 233:23–36. 2016.
- 451 3. Baigent, S. J., L. P. Smith, R. J. W. Currie, and V. K. Nair. Replication kinetics of  
452 Marek's disease vaccine virus in feathers and lymphoid tissues using PCR and virus  
453 isolation. *J. Gen. Virol.* 86:2989–2998. 2005.
- 454 4. Bettridge, J. M., S. E. Lynch, M. C. Brena, K. Melese, T. Dessie, Z. G. Terfa, T. T.  
455 Desta, S. Rushton, O. Hanotte, P. Kaiser, P. Wigley, and R. M. Christley. Infection-  
456 interactions in Ethiopian village chickens. *Prev. Vet. Med.* 117:358–366. 2014.

- 457 5. Biggs, P. M., D. G. Powell, A. E. Churchill, and R. C. Chubb. The epizootiology of  
458 Marek's disease: I. Incidence of antibody, viraemia and Marek's disease in six flocks.  
459 Avian Pathol. 1:5–25. 1972.
- 460 6. Bolker, B. M. Ecological Models and Data in R. Princeton, New Jersey: Princeton  
461 University Press. pp. 212-215. 2008.
- 462 7. Bolker, B. M., M. E. Brooks, C. J. Clark, S. W. Geange, J. R. Poulsen, M. H. H. Stevens,  
463 and J.-S. S. White. Generalized linear mixed models: a practical guide for ecology and  
464 evolution. Trends Ecol. Evol. 24:127–135. 2009.
- 465 8. Burnham, K. P. and D. R. Anderson. Model selection and multimodel inference: a  
466 practical information-theoretic approach. New York, New York: Springer–Verlag. pp.  
467 70-72. 2002.
- 468 9. Calnek, B. W., H. K. Adldinger, and D. E. Kahn. Feather follicle epithelium: a source of  
469 enveloped and infectious cell-free herpesvirus from Marek's disease. Avian Dis. 14:219–  
470 233. 1970.
- 471 10. Carrozza, J. H., T. N. Fredrickson, R. P. Prince, and R. E. Luginbuhl. Role of  
472 desquamated epithelial cells in transmission of Marek's disease. Avian Dis. 17:767–781.  
473 1973.
- 474 11. Chubb, R. C. and A. E. Churchill. Precipitating antibodies associated with Marek's  
475 disease. Vet. Rec. 83:4–7. 1968.
- 476 12. Collins, M. and B. Algers. Effects of stable dust on farm animals – a review. Vet. Res.  
477 Commun. 10:415–428. 1986.
- 478 13. Colwell, W. M. and S. C. Schmittle. Studies on acute Marek's disease. VII. Airborne  
479 transmission of the GA isolate. Avian Dis. 12:724–729. 1968.
- 480 14. Dunn, J. Marek's disease in poultry. In: The Merck Veterinary Manual. [Internet].  
481 [Accessed: 2016-01-11]. Available from:  
482 [http://www.merckvetmanual.com/mvm/poultry/neoplasms/mareks\\_disease\\_in\\_poultry.ht](http://www.merckvetmanual.com/mvm/poultry/neoplasms/mareks_disease_in_poultry.html?qt=marek%27s%20disease&alt=sh)  
483 [ml?qt=marek%27s%20disease&alt=sh](http://www.merckvetmanual.com/mvm/poultry/neoplasms/mareks_disease_in_poultry.html?qt=marek%27s%20disease&alt=sh).
- 484 15. Dunn, J. R. and I. M. Gimeno. Current status of Marek's disease in the United States and  
485 worldwide based on a questionnaire survey. Avian Dis. 57:483–490. 2013.
- 486 16. Gelman, A. and J. Hill. Data Analysis Using Regression and Multilevel/Hierarchical  
487 Models. New York, New York: Cambridge University Press. pp. 325-342. 2009.
- 488 17. Groves, P. J., S. W. Walkden-Brown, A. F. M. F. Islam, P. S. Reynolds, M. L. King, and  
489 S. M. Sharpe. An epidemiological survey of MDV in Australian broiler flocks. Abstract.  
490 Proc. 8th International Marek's Disease Symposium, Townsville, Australia, pp. 24. 2008.
- 491 18. Hadfield, J. D. MCMC methods for multi-response generalized linear mixed models: the  
492 MCMCglmm R package. J. Stat. Softw. 33:1–22. 2010.
- 493 19. Huang, J. Z. and C. J. Stone. Extended linear modeling with splines. In: Nonlinear  
494 Estimation and Classification. D. D. Denison, M. H. Hansen, C. C. Holmes, B. Mallick,  
495 and B. Yu, eds. New York, New York: Springer-Verlag. pp. 213–233. 2003.

- 496 20. Ianconescu, M. and Y. Samberg. Etiological and immunological studies in Marek's  
497 disease. II. Incidence of Marek's disease precipitating antibodies in commercial flocks  
498 and in eggs. *Avian Dis.* 15:177–186. 1971.
- 499 21. Islam, A., B. F. Cheetham, T. J. Mahony, P. L. Young, and S. W. Walkden-Brown.  
500 Absolute quantitation of Marek's disease virus and Herpesvirus of turkeys in chicken  
501 lymphocyte, feather tip and dust samples using real-time PCR. *J. Virol.*  
502 *Methods* 132:127–134. 2006.
- 503 22. Islam, A. and S. W. Walkden-Brown. Quantitative profiling of the shedding rate of the  
504 three Marek's disease virus (MDV) serotypes reveals that challenge with virulent MDV  
505 markedly increases shedding of vaccinal viruses. *J. Gen. Virol.* 88:2121–2128. 2007.
- 506 23. Islam, A. F. M., S. W. Walkden-Brown, P. J. Groves, and G. J. Underwood. Kinetics of  
507 Marek's disease virus (MDV) infection in broiler chickens 1: effect of varying  
508 vaccination to challenge interval on vaccinal protection and load of MDV and  
509 herpesvirus of turkey in the spleen and feather dander over time. *Avian Pathol.* 37:225–  
510 235. 2008.
- 511 24. Jurajda, V. and B. Klimes. Presence and survival of Marek's disease agent in dust. *Avian*  
512 *Dis.* 14:188–190. 1970.
- 513 25. Kennedy, D. A., V. Dukic, and G. Dwyer. Combining principal component analysis with  
514 parameter line-searches to improve the efficacy of Metropolis–Hastings MCMC.  
515 *Environ. Ecol. Stat.* 22:247–274. 2014.
- 516 26. Kennedy, D. A., J. R. Dunn, P. A. Dunn, and A. F. Read. An observational study of the  
517 temporal and spatial patterns of Marek's-disease-associated leukosis condemnation of  
518 young chickens in the United States of America. *Prev. Vet. Med.* 120:328–335. 2015.
- 519 27. Morrow, C. and F. Fehler. Marek's disease: a worldwide problem. In: *Marek's Disease:*  
520 *An Evolving Problem.* F. Davison and V. Nair, eds. San Diego, California: Elsevier  
521 Academic Press. pp. 49–61. 2004.
- 522 28. Nair, V. Evolution of Marek's disease—a paradigm for incessant race between the  
523 pathogen and the host. *Vet. J.* 170:175–183. 2005.
- 524 29. Nakagawa, S. and H. Schielzeth. A general and simple method for obtaining  $R^2$  from  
525 generalized linear mixed-effects models. *Methods Ecol. Evol.* 4:133–142. 2013.
- 526 30. Office International des Epizooties. Chapter 2.3.13, Marek's disease. In: *OIE Terrestrial*  
527 *Manual.* [Internet]. [accessed: 2016-01-06]. Available from:  
528 [http://www.oie.int/fileadmin/Home/eng/Health\\_standards/tahm/2.03.13\\_Marek\\_Dis.pdf](http://www.oie.int/fileadmin/Home/eng/Health_standards/tahm/2.03.13_Marek_Dis.pdf).
- 529 31. Osterrieder, N., J. P. Kamil, D. Schumacher, B. K. Tischer, and S. Trapp. Marek's  
530 disease virus: from miasma to model. *Nature Rev. Microbiol.* 4:283–294. 2006.
- 531 32. Pandey, U., A. S. Bell, D. W. Renner, D. A. Kennedy, J. T. Shreve, C. L. Cairns, M. J.  
532 Jones, P. A. Dunn, A. F. Read, and M. L. Szpara. DNA from dust: comparative genomics  
533 of large DNA viruses in field surveillance samples. *mSphere* 1:e00132–16. 2016.
- 534 33. Purchase, H. G. Prevention of Marek's disease: a review. *Cancer Res.* 36:696–700. 1976.

- 535 34. Purchase, H. G. Clinical disease and its economic impact. In: Marek's Disease: Scientific  
536 Basis and Methods of Control. L. N. Payne, ed. Boston, Massachusetts: Martinus Nijhoff  
537 Publishing. pp. 17–42. 1985.
- 538 35. Purchase, H. G. and W. Okazaki. Effect of vaccination with herpesvirus of turkeys  
539 (HVT) on horizontal spread of Marek's disease herpesvirus. *Avian Dis.* 15:391–397.  
540 1971.
- 541 36. R Development Core Team. R: A Language and Environment for Statistical Computing.  
542 Vienna, Austria: R Foundation for Statistical Computing. 2014.
- 543 37. Ralapanawe, S., K. G. Renz, S. K. Burgess, and S. W. Walkden-Brown. Field studies on  
544 the detection, persistence and spread of the Rispens CVI988 vaccine virus and the extent  
545 of co-infection with Marek's disease virus. *Aust. Vet. J.* 94:329–337. 2015.
- 546 38. Ralapanawe, S., S. W. Walkden-Brown, A. F. M. F. Islam, and K. G. Renz. Effects of  
547 Rispens CVI988 vaccination followed by challenge with Marek's disease viruses of  
548 differing virulence on the replication kinetics and shedding of the vaccine and challenge  
549 viruses. *Vet. Microbiol.* 183:21–29. 2016.
- 550 39. Read, A. F., S. J. Baigent, C. Powers, L. B. Kgosana, L. Blackwell, L. P. Smith, D. A.  
551 Kennedy, S. W. Walkden-Brown, and V. K. Nair. Imperfect vaccination can enhance the  
552 transmission of highly virulent pathogens. *PLoS Biol.* 13:e1002198. 2015.
- 553 40. Rieu, I. and S. J. Powers. Real-time quantitative RT-PCR: design, calculations, and  
554 statistics. *Plant Cell* 21:1031–1033. 2009.
- 555 41. Rozins, C. and T. Day. Disease eradication on large industrial farms. *J. Math.*  
556 *Biol.* 73:885–902. 2016.
- 557 42. Spiegelhalter, D. J., N. G. Best, B. P. Carlin, and A. van der Linde. Bayesian measures of  
558 model complexity and fit. *J. Roy. Stat. Soc. B* 64:583–639. 2002.
- 559 43. Wajid, S. J., M. E. Katz, K. G. Renz, and S. W. Walkden-Brown. Prevalence of Marek's  
560 disease virus in different chicken populations in Iraq and indicative virulence based on  
561 sequence variation in the EcoRI-Q (*meq*) gene. *Avian Dis.* 57:562–568. 2013.
- 562 44. Walkden-Brown, S. W., A. Islam, P. J. Groves, A. Rubite, S. M. Sharpe, and S. K.  
563 Burgess. Development, application, and results of routine monitoring of Marek's disease  
564 virus in broiler house dust using real-time quantitative PCR. *Avian Dis.* 57:544–554.  
565 2013.
- 566 45. Witter, R. L. Historic incidence of Marek's disease as revealed by condemnation  
567 statistics. In: *Current Research on Marek's Disease: Proc. 5th International Symposium*  
568 *on Marek's Disease.* R. F. Silva, H. H. Cheng, P. M. Coussens, L. F. Lee, and L. F.  
569 Velicer, eds. Kennett Square, Pennsylvania: American Association of Avian Pathologists.  
570 pp. 501–508. 1996.
- 571 46. Witter, R. L. Increased virulence of Marek's disease virus field isolates. *Avian*  
572 *Dis.* 41:149–163. 1997.
- 573 47. Witter, R. L., J. J. Solomon, L. R. Champion, and K. Nazerian. Long-term studies of  
574 Marek's disease infection in individual chickens. *Avian Dis.* 15:346–365. 1971.



575

## 576 **Acknowledgements**

577 We thank the participating poultry companies of Pennsylvania for providing access to  
578 farms and to flock information. We thank John Dunn for supplying us with the  
579 prMd5pp38-1 plasmid. This work was funded by the Institute of General Medical  
580 Sciences (R01GM105244), National Institutes of Health and United Kingdom  
581 Biotechnology and Biological Sciences Research Council as part of the joint NSF-  
582 NIH-USDA Ecology and Evolution of Infectious Diseases program, and by the  
583 RAPIDD program of the Science and Technology Directorate, Department of  
584 Homeland Security and Fogarty International Center, National Institutes of Health  
585 (DAK, AFR). The funders had no role in study design, data collection and analysis,  
586 decision to publish, or preparation of the manuscript.

587

## 588 **Table legend:**

589 **Table 1:** Deviance information criterion (DIC) table for models considered. “Mean  
590 deviance” is the average deviance of the posterior.  $\Delta$ DIC is defined as the difference in  
591 DIC between the model with the smallest DIC and the focal model. Note that the “Full  
592 model” is in bold to highlight that it was the best model according to DIC.

## 593 **Figure legends:**

594 **Figure 1:** The structure of the data in our study. Left panel: a schematic example of a  
595 sampling hierarchy generated by the structure of the poultry industry. Reading from  
596 the bottom up, multiple samples were collected from a single flock, multiple flocks  
597 were reared in a single house over time, multiple houses were located on a single farm,  
598 multiple farms were associated with a single operation (company), and multiple  
599 operations were rearing chickens that typically belonged to a single production type.  
600 This created a nested hierarchical structure in the data. One example of such a  
601 hierarchy is shown here. Right panel: the actual number of unique levels are given by  
602 “C” for the cross-sectional data, “L” for the longitudinal data, “A” for the air tube data,  
603 and “F” for the feather tip data.

604  
605 **Figure 2:** Summary plots of the cross-sectional data depicting the number of assays that  
606 were performed as a function of production type (A), operation (B), farm (C), sex (D),  
607 month of the year (E), bird age (F), and flock size (G). For example, in panel B, 520  
608 assays were run for samples collected from operation 4. Also depicted are the  
609 approximate locations of origin of each sample (H) and each farm (I). Note that to  
610 maintain farm location anonymity, normal random variables with mean 0 and standard  
611 deviation 0.1 were added to the points when plotting latitude and longitudes in H and I.  
612 In all plots, black color depicts breeder facilities, red color depicts broiler facilities, and  
613 blue color depicts layer facilities.

614  
615 **Figure 3:** Fraction of tests with detectable virus. Each point shows the mean for a different  
616 house with grey bars depicting 95% confidence intervals on the mean (Supplement

617 [A.15](#)). Confidence intervals vary between houses because of variable sample sizes.  
618 Different rows depict different production types (top–breeders, middle–broilers,  
619 bottom–layers). Solid black lines separate different operations (companies). Dashed  
620 red lines separate different farms. Note that prevalence estimates are from the raw data,  
621 not corrected to account for potential confounding effects such as bird age, collection  
622 date, or flock.

623  
624 **Figure 4:** Fraction of variance on the latent scale attributable to each model factor. Points  
625 are median values and lines are 95% credible intervals. Marginal and conditional  $R^2$   
626 values represent the variance explainable by all fixed effects, and all fixed plus random  
627 effects respectively. Note that only the values for the best model (Table [1](#)) are shown.

628  
629 **Figure 5:** Effect sizes for fixed effects. The top panel shows the median and 95% credible  
630 interval for the three production types. The middle panel shows the median and 95%  
631 credible interval for the effect of bird age on the probability of detecting virus in a dust  
632 sample. The bottom panel shows the median and 95% credible interval for the effect of  
633 collection date on the probability of detecting virus.

634  
635 **Figure 6:** Longitudinal surveillance data for three broiler farms in Pennsylvania. Each panel  
636 is labelled “X-Y”, where “X” gives a unique farm identification, and “Y” gives a house  
637 number on that farm such that each two character label is unique. Each of the three  
638 farms shown in this figure had two houses. All of these farms began associated with  
639 the same operation, but farm “C” changed operations in the middle of our surveillance.

640 The timing of this change is denoted by an asterisk in the plot. All farms followed an  
641 “all-in, all-out” policy meaning that houses had discrete periods of rearing and down  
642 time. To represent the presence or absence of birds, white intervals cover periods when  
643 birds were present, grey intervals cover periods when birds were absent, and blue  
644 intervals cover unknown periods. Each point represents the log-mean virus  
645 concentration (VCN) for that set of dust samples. Error bars are 95% confidence  
646 intervals calculated as explained in Supplement [A.15](#). The dotted horizontal line shows  
647 the approximate qPCR limit of detection for a single test.

648

649 **Figure 7:** Longitudinal surveillance data for two additional broiler farms in Pennsylvania.

650 Symbols, colors and layout as in [fig. 6](#). Both of these farms had four houses. Farm “D”  
651 was associated with the same operation as the farms in [fig. 6](#), but farm “E” was not.  
652 Note also that farm “E” changed operations during our surveillance period, the timing  
653 of which is marked with an asterisk.

654

655 **Figure 8:** Air tube data (left column) and feather tip data (right column) for two broiler  
656 farms in Pennsylvania. Symbols, colors and layout as in [fig. 6](#). Note that the dynamics  
657 in the air tube data and feather tip data are highly similar to one another, and are highly  
658 similar to that of the corresponding houses in the cross-sectional data ([fig. 6](#)). As in [fig.](#)  
659 6, a change in operation on farm C is denoted by an asterisk.

660

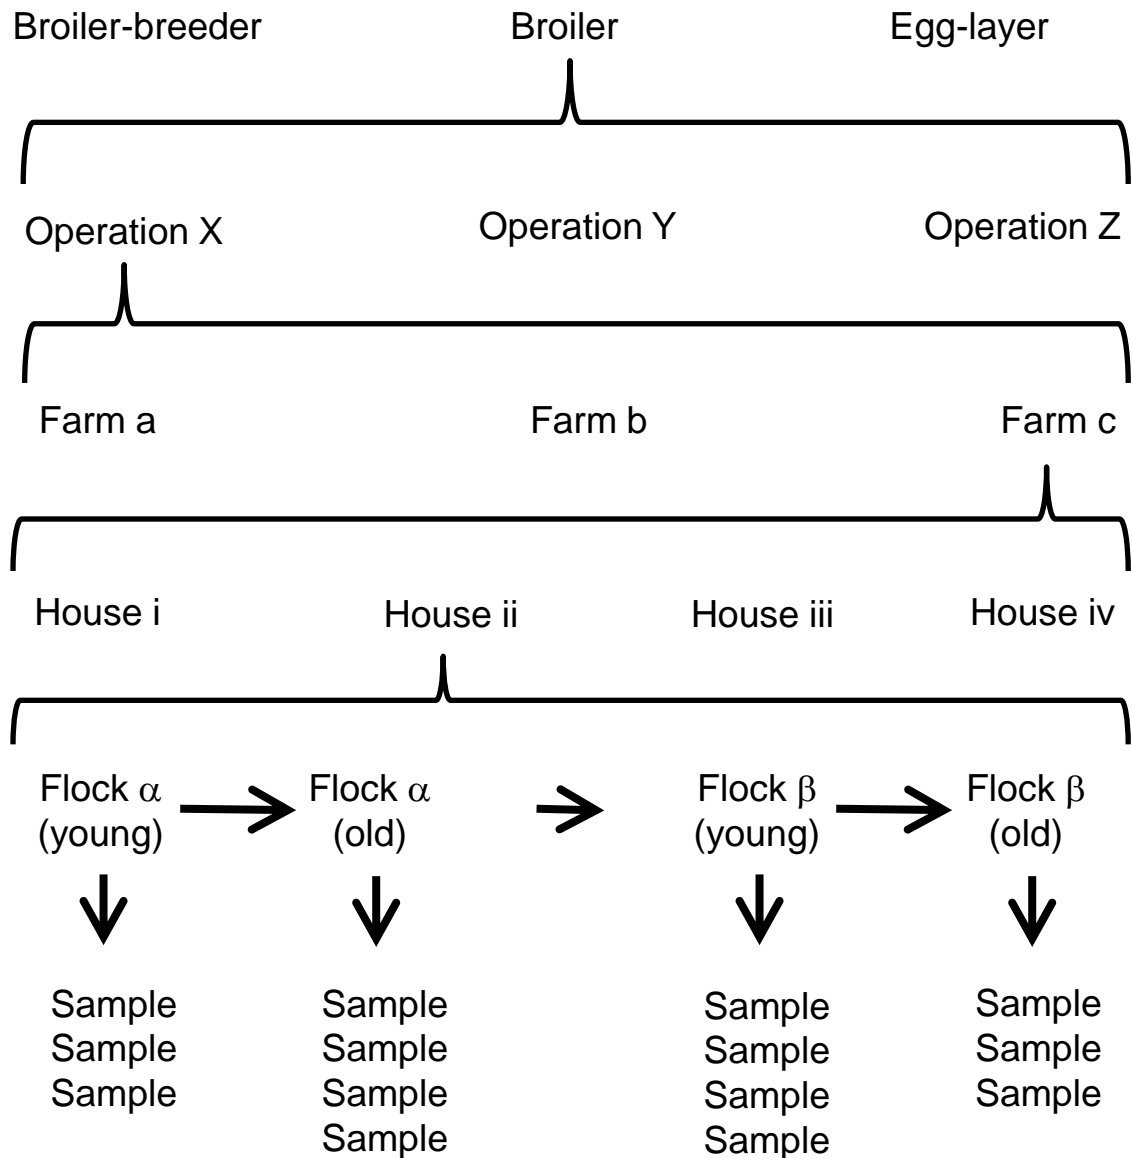

**Production types**

C=3; L=1;

A=1; F=1;

**Operations**

C=13; L=4;

A=2; F=2;

**Farms**

C=90; L=5;

A=2; F=2;

**Houses**

C=192; L=14;

A=4; F=4;

**Flocks**

C=297; L=149;

A=15; F=20;

**Samples**

C=1018; L=3727;

A=609; F=2003;

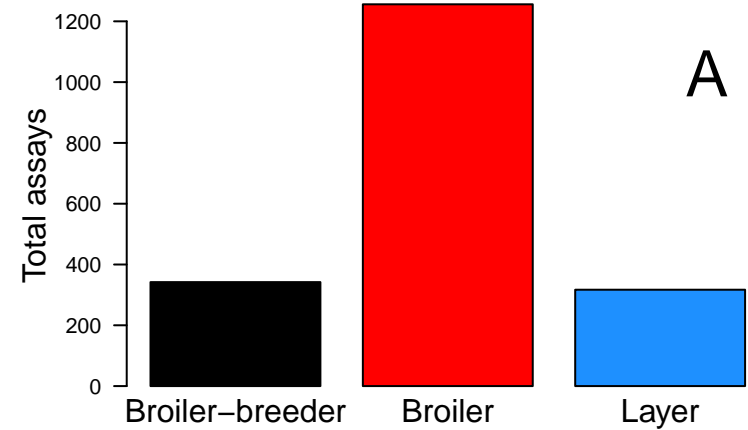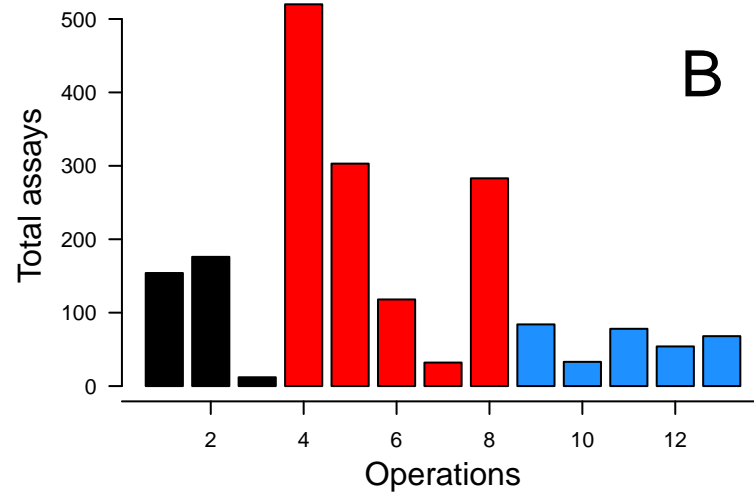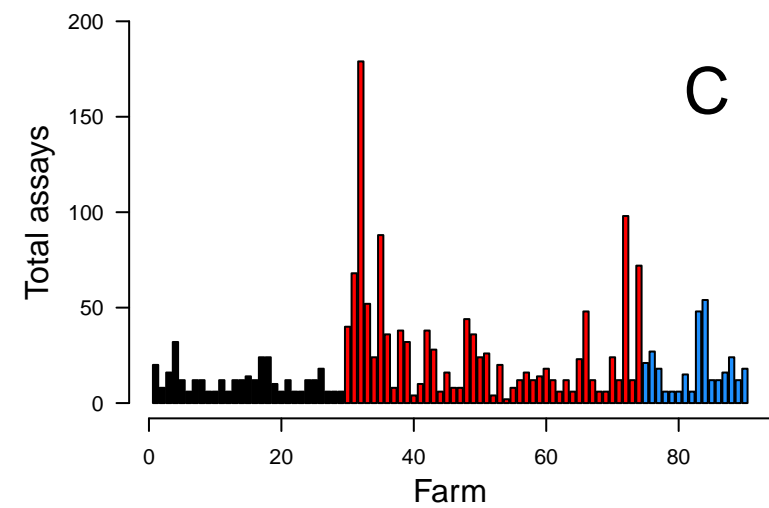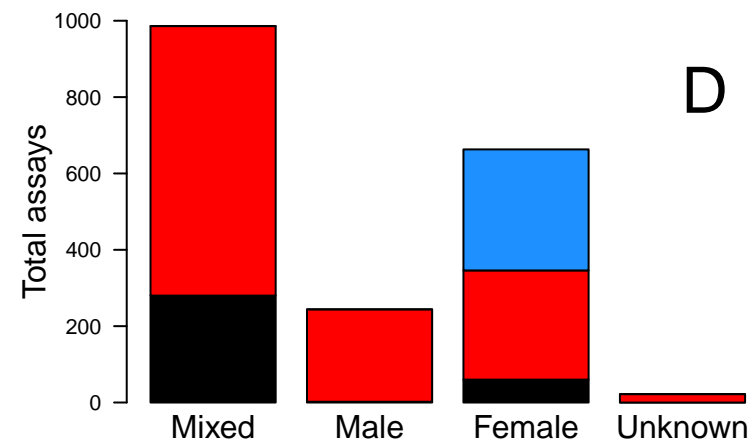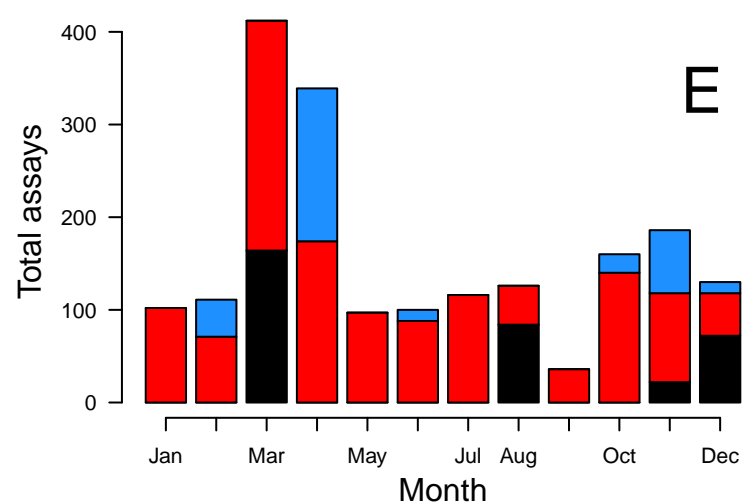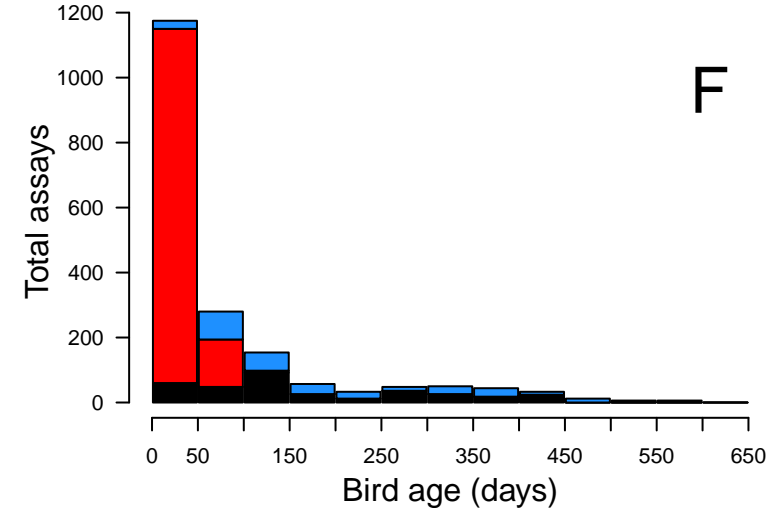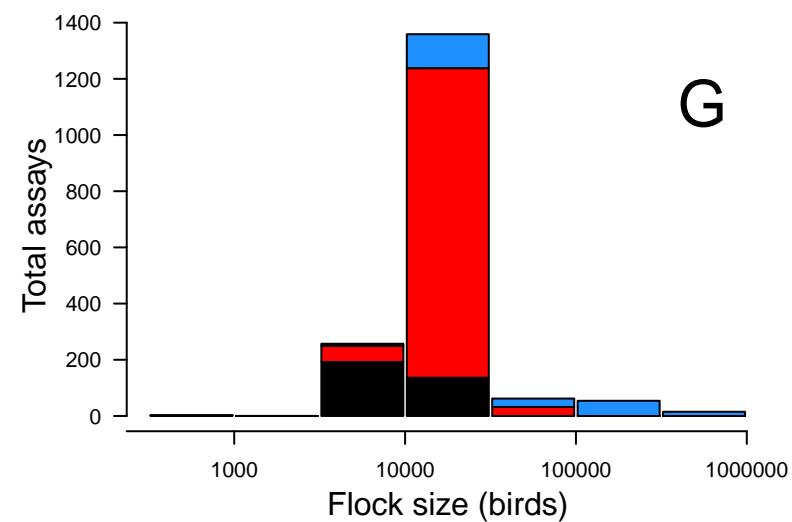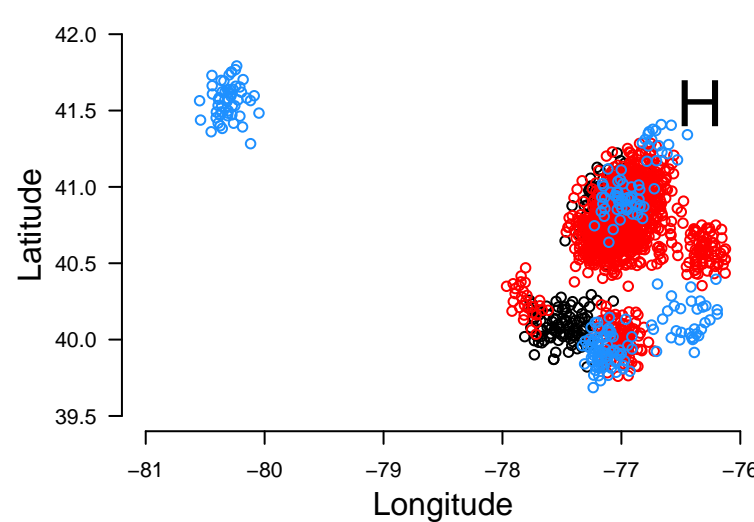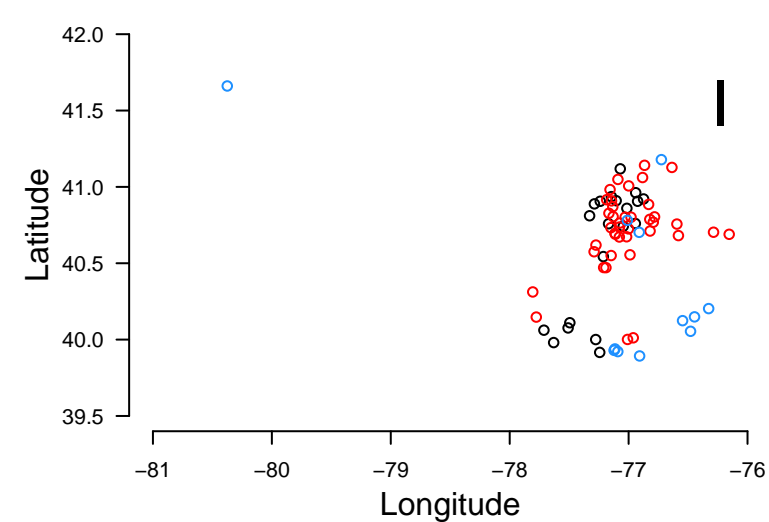

### Breeder

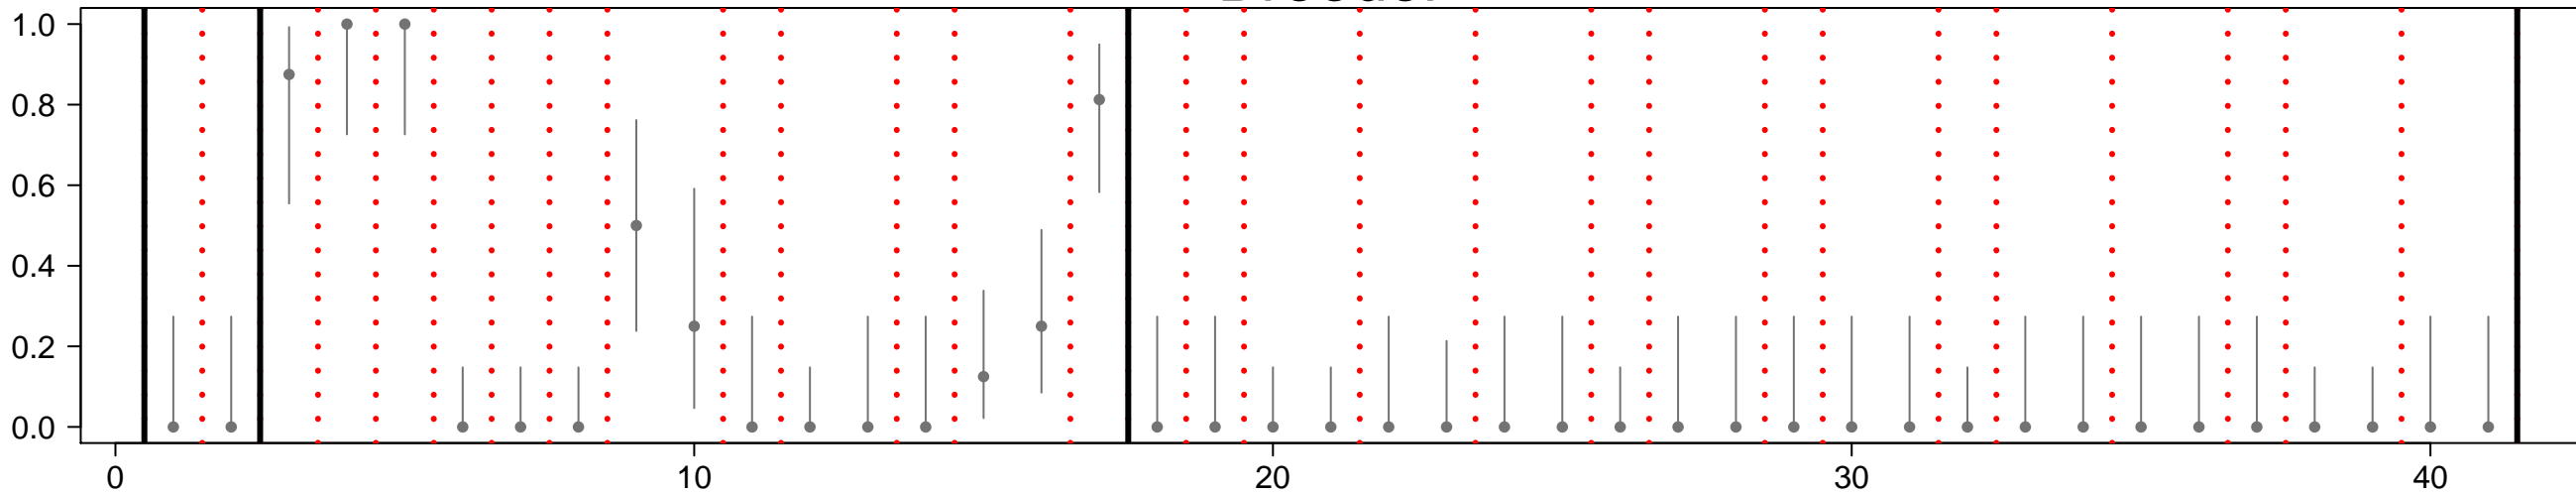

### Broiler

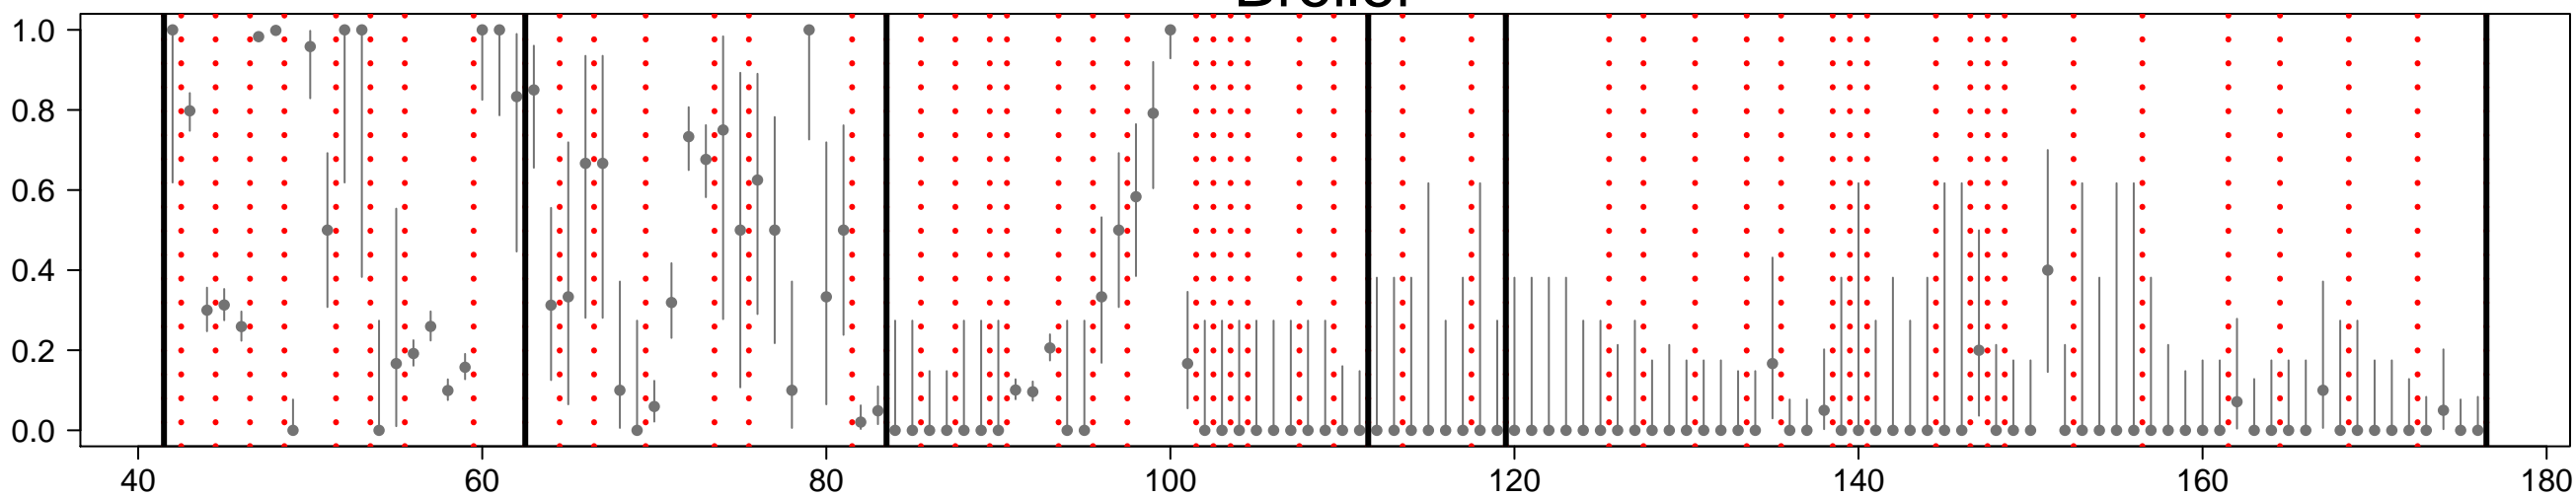

### Layer

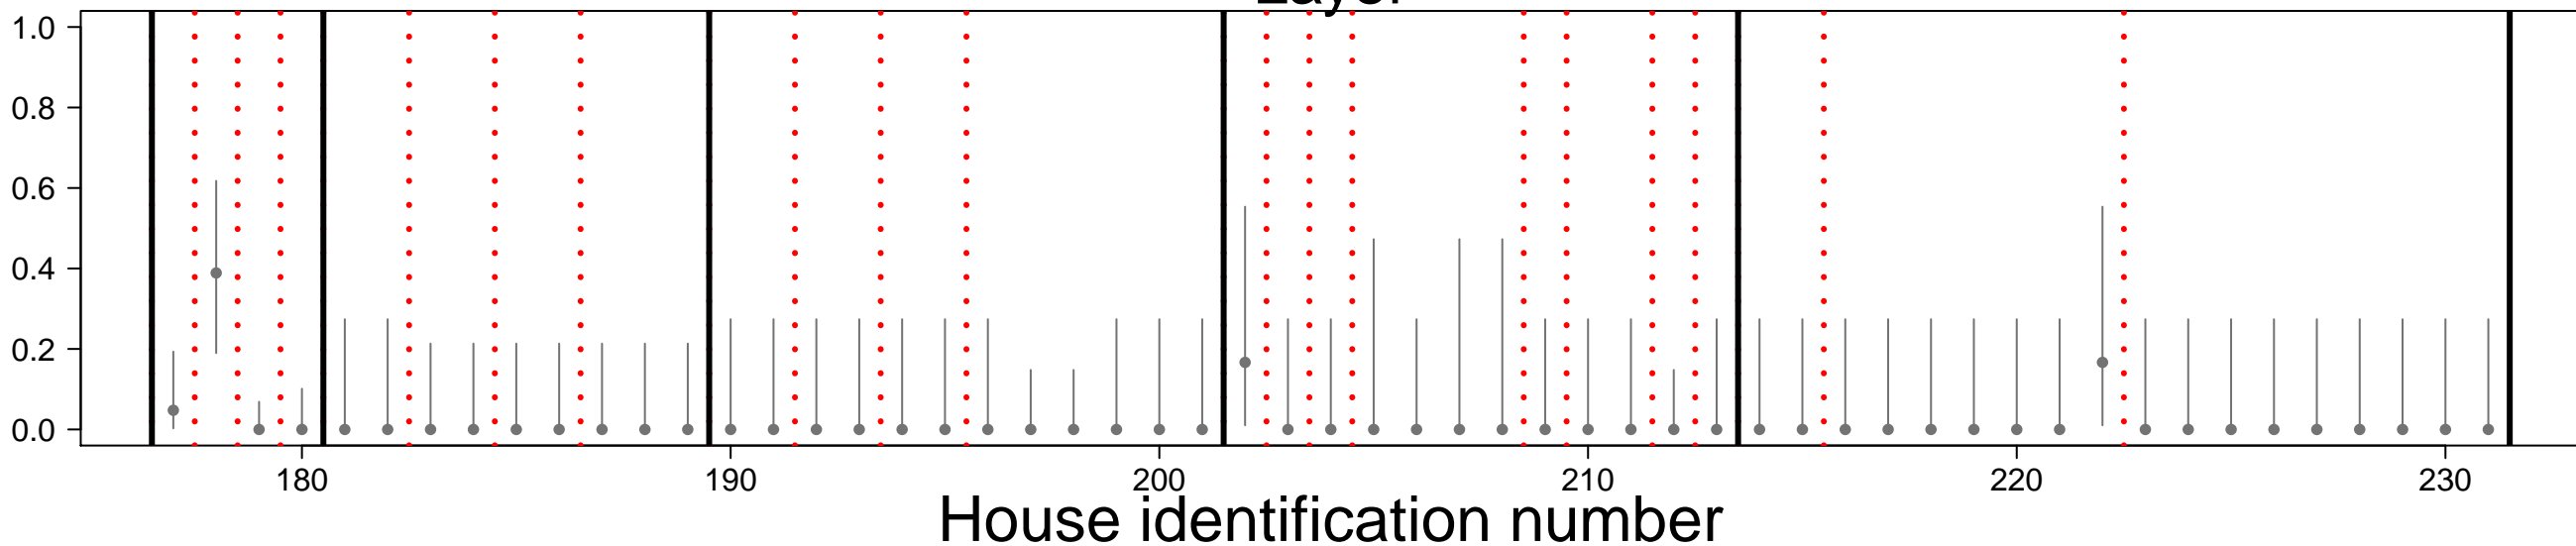

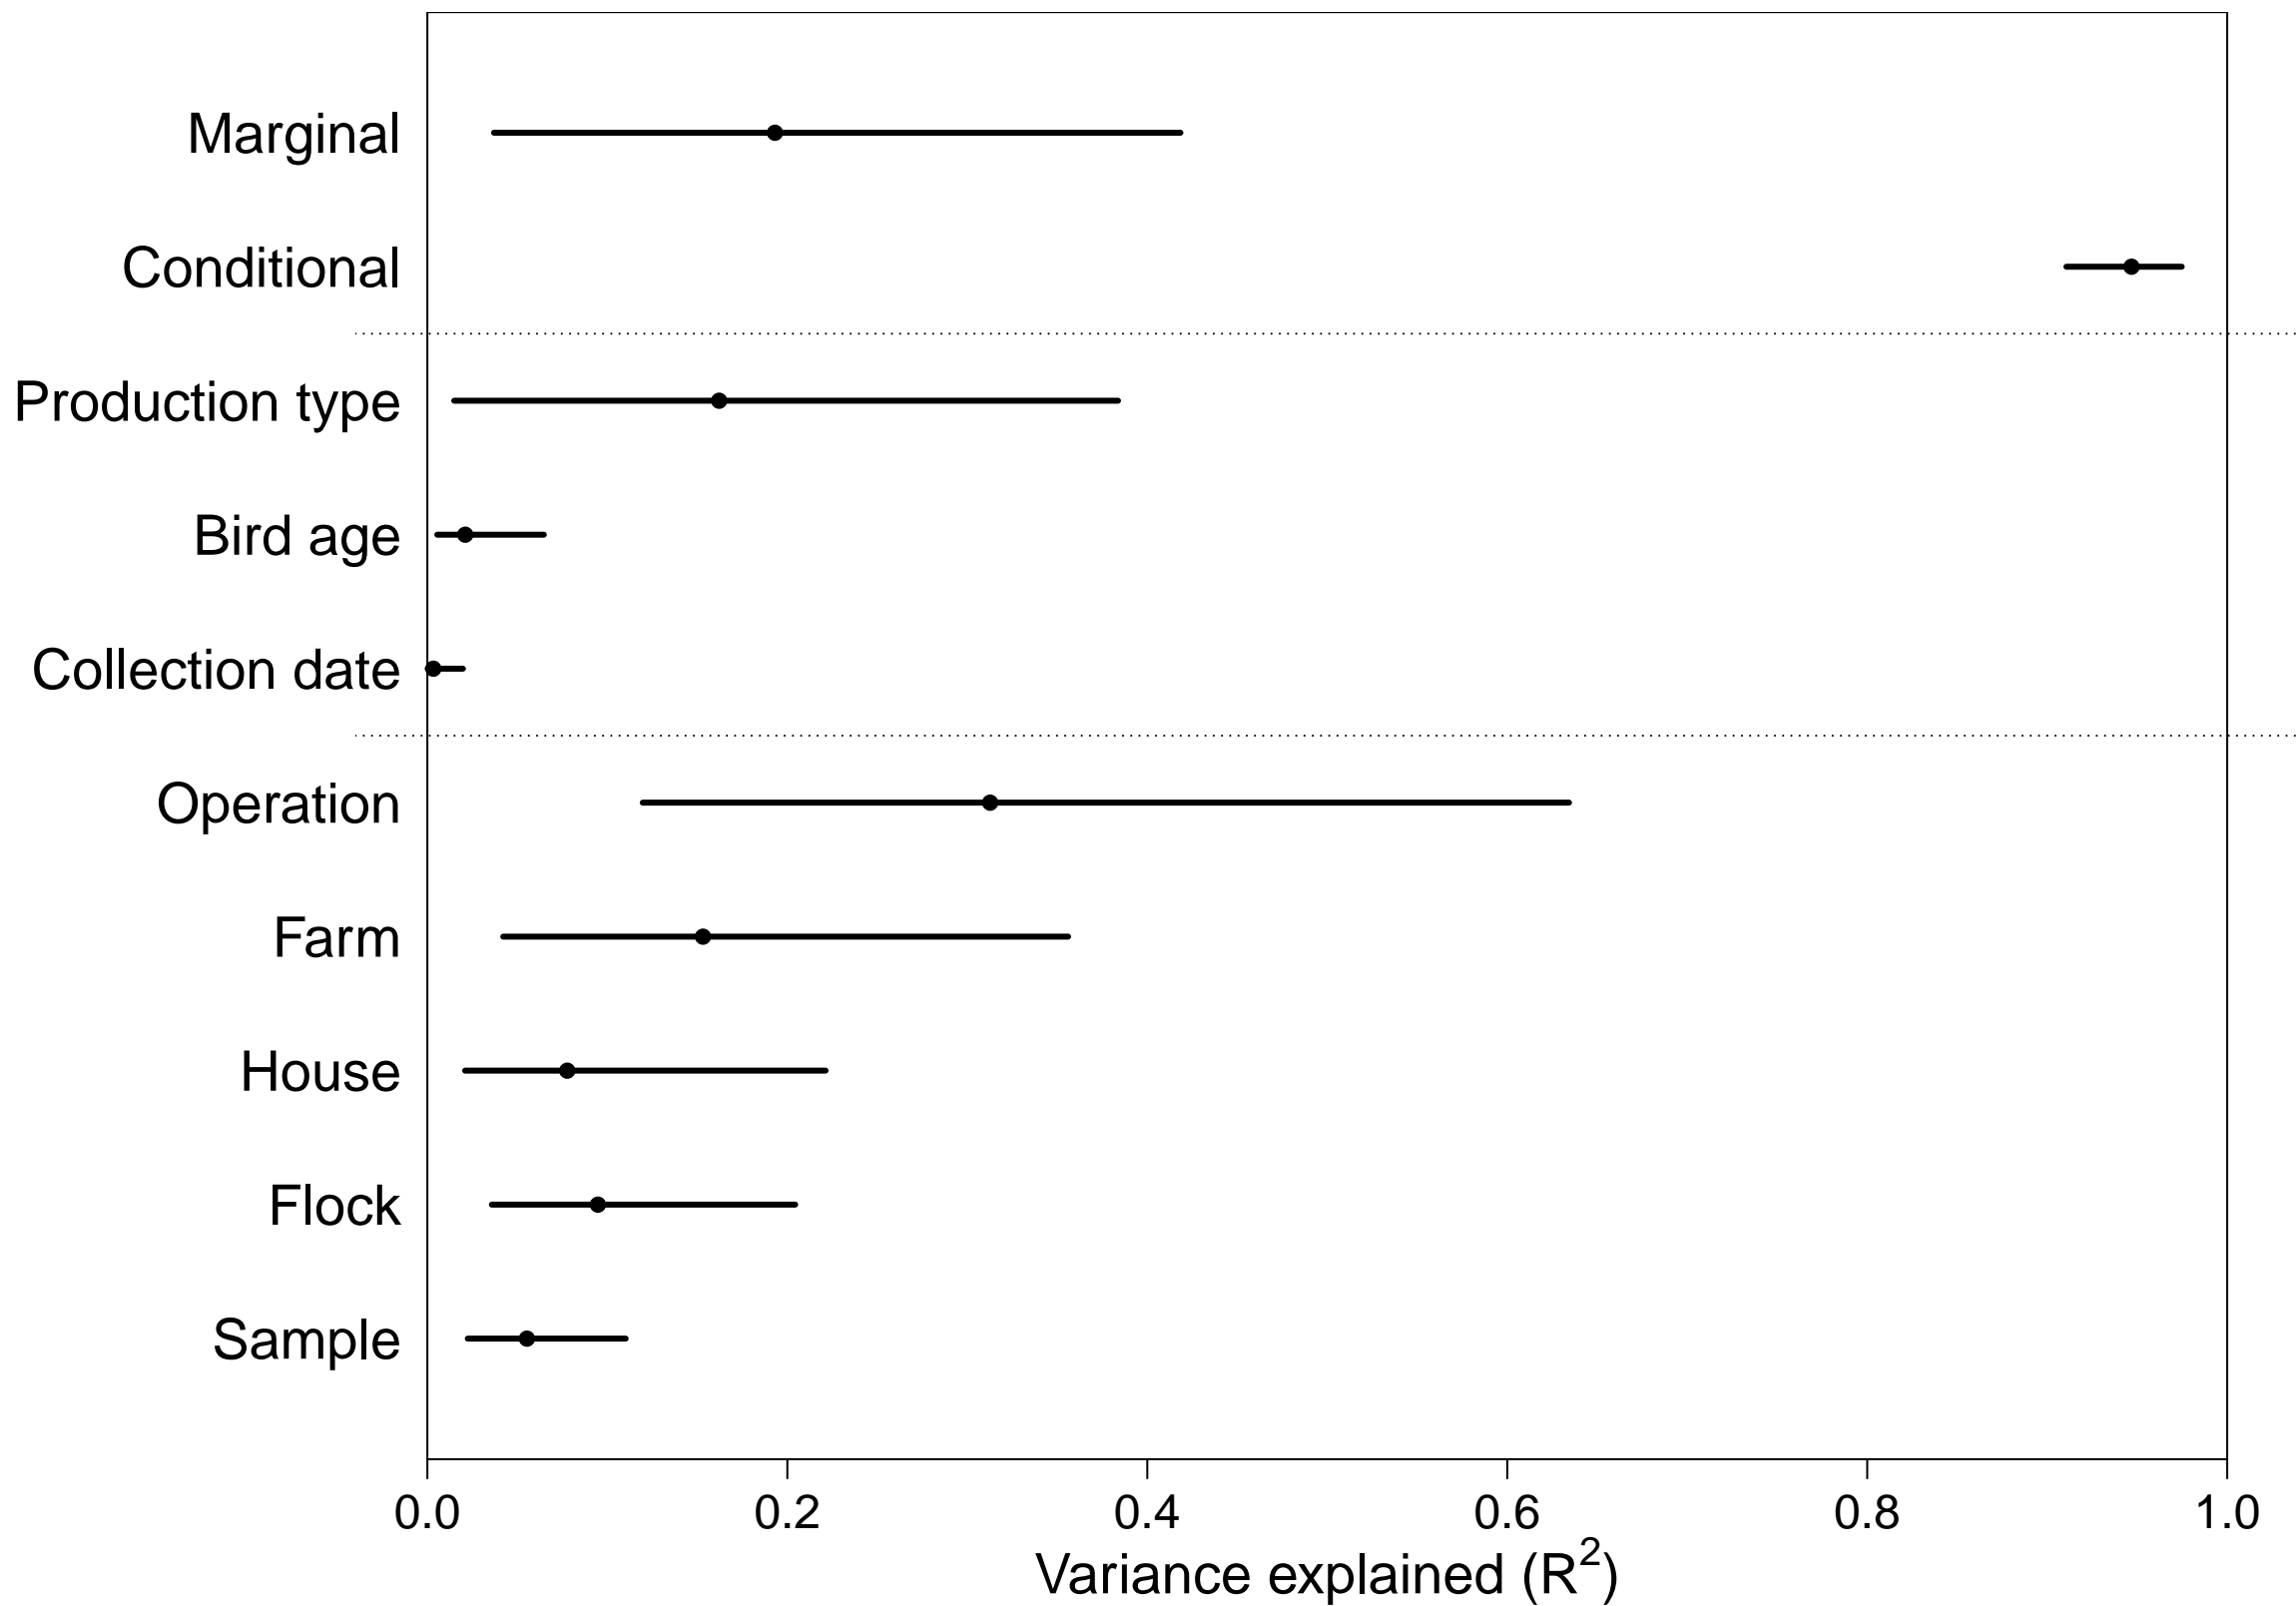



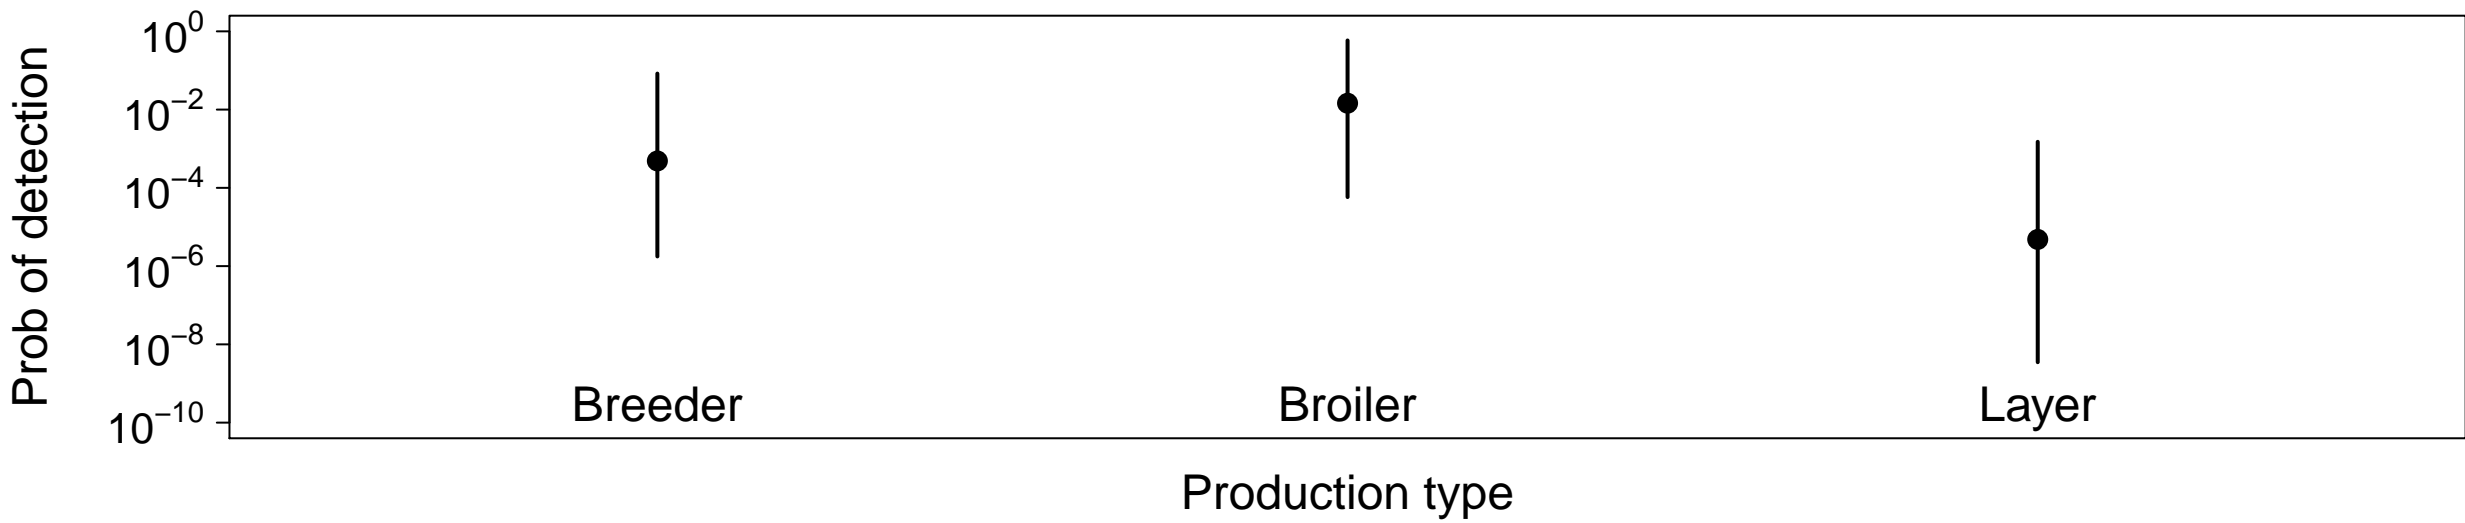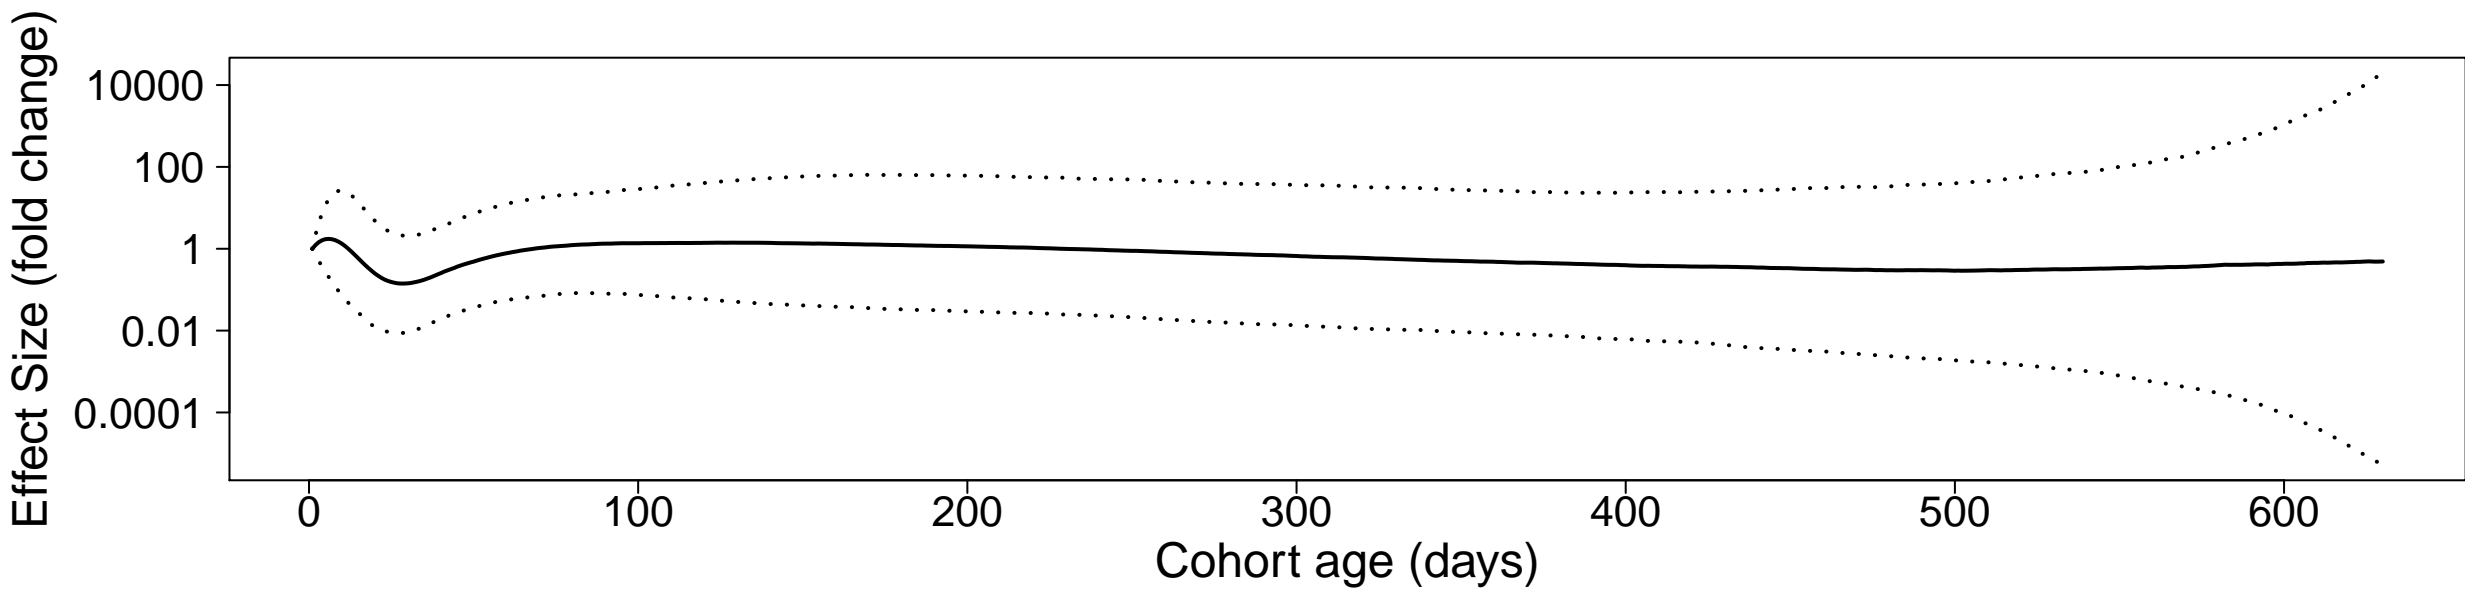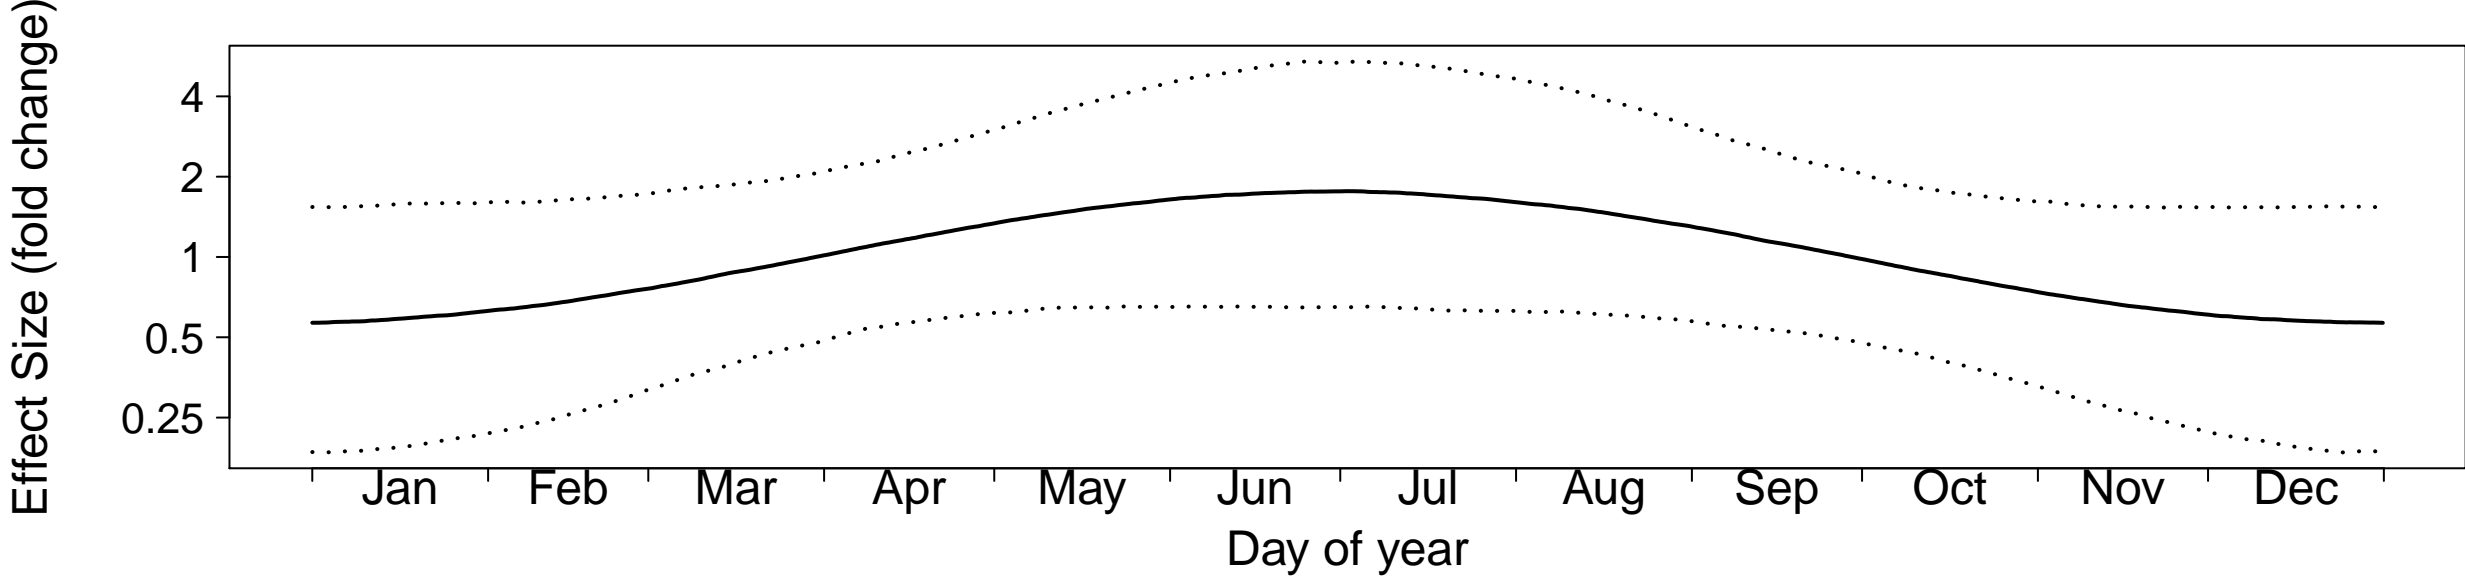

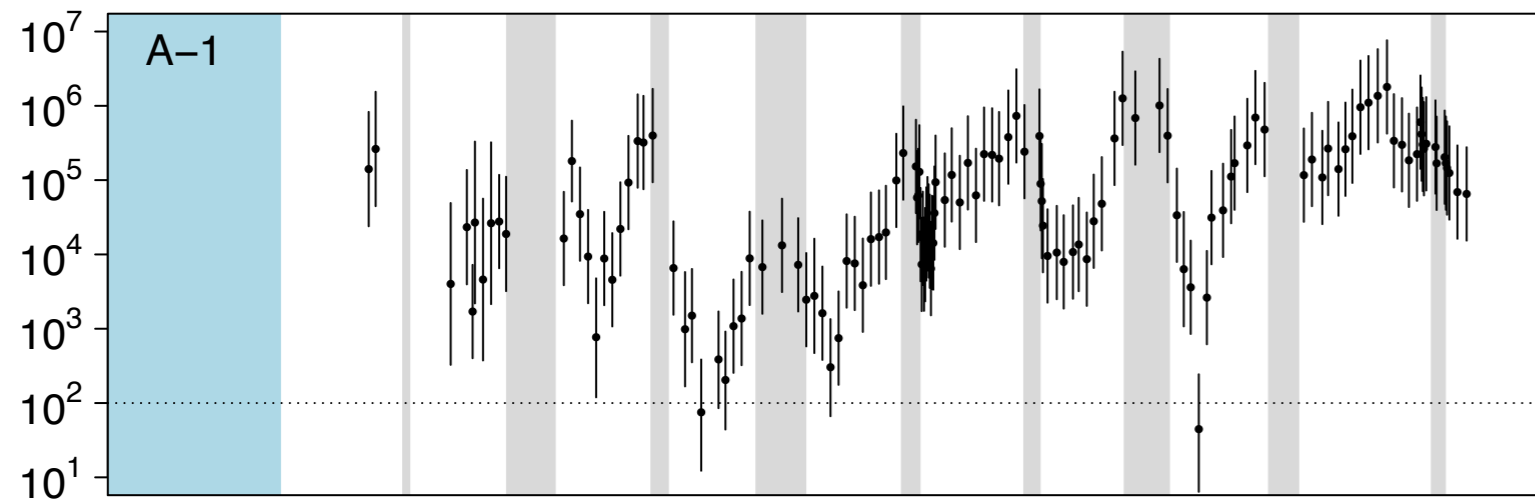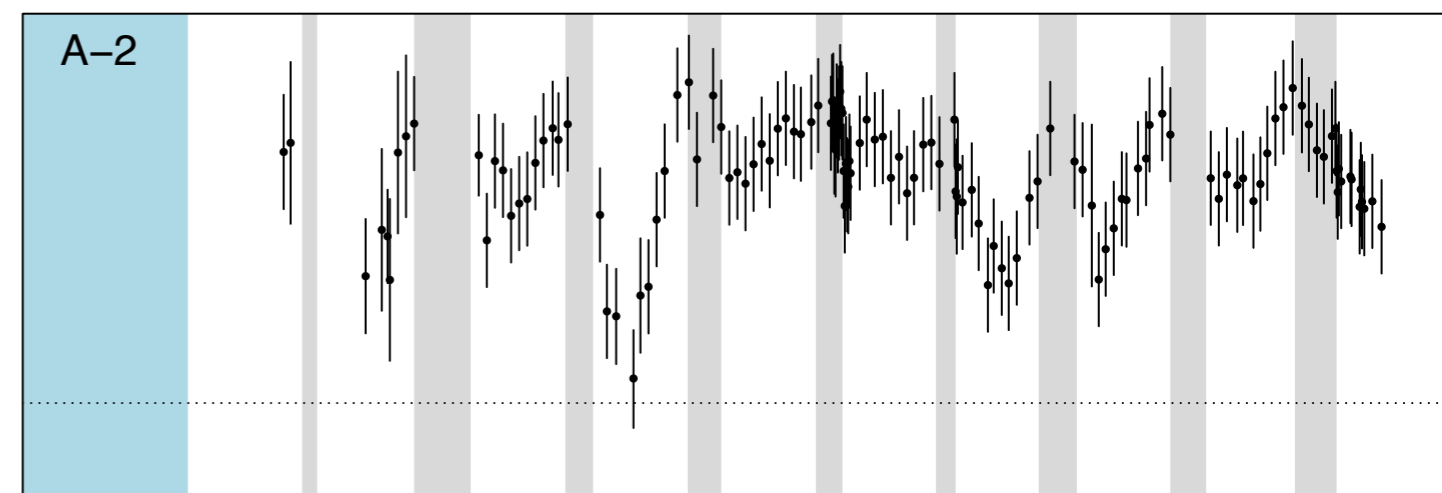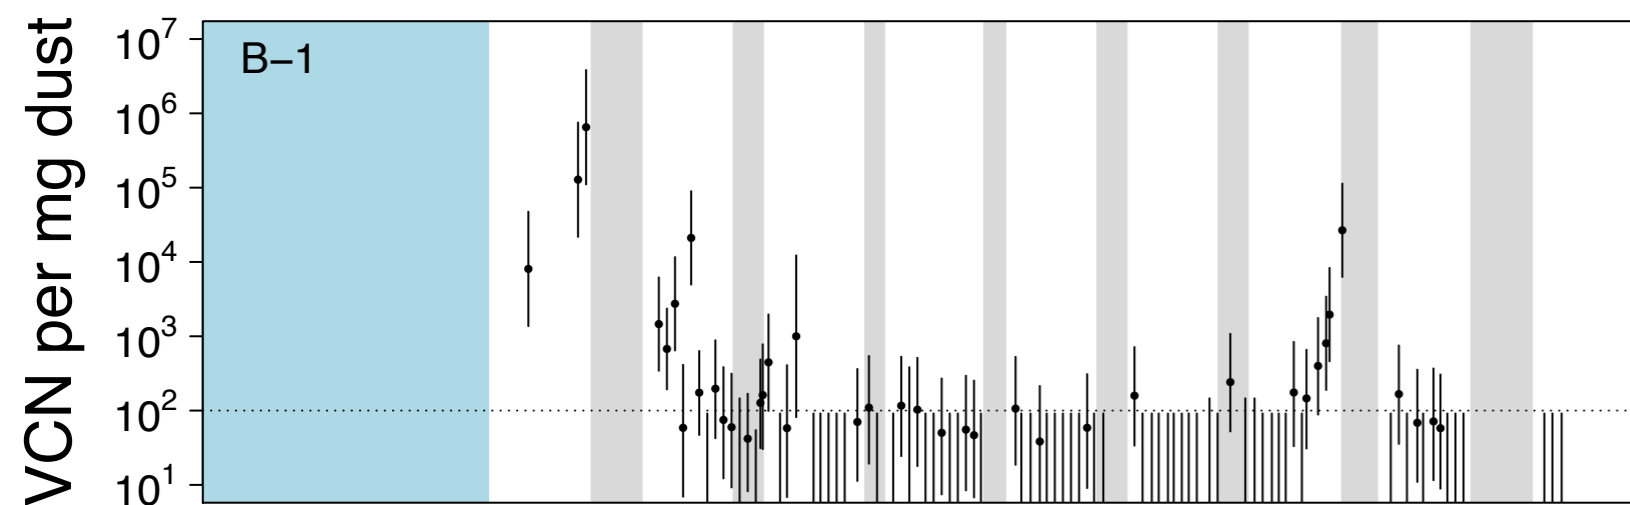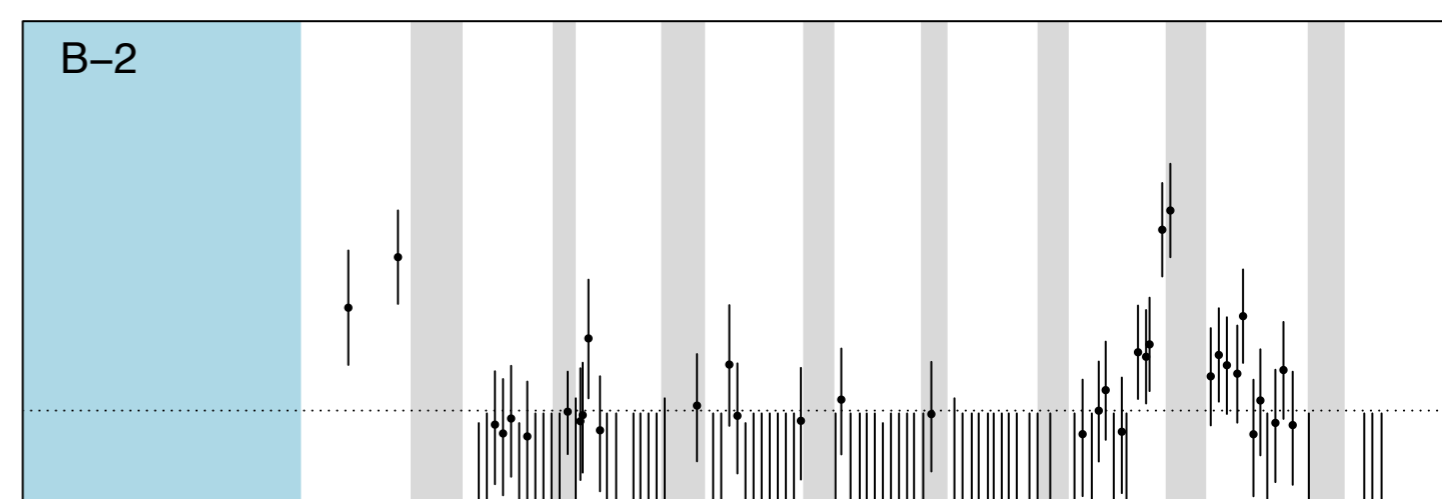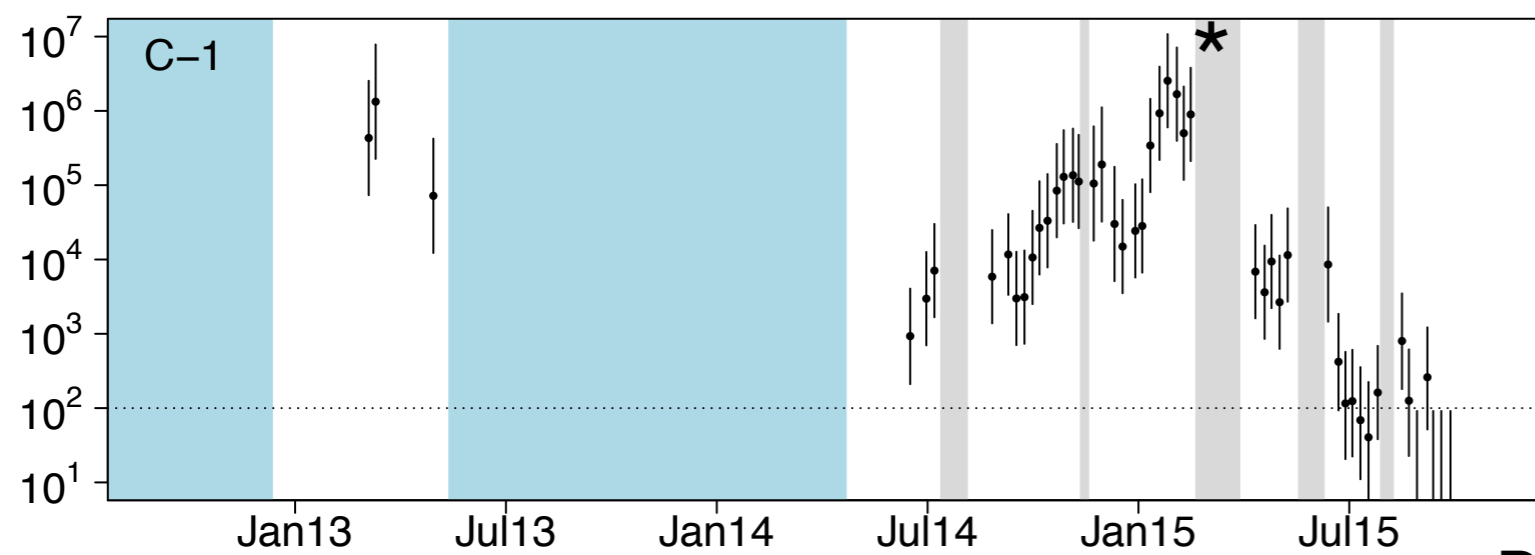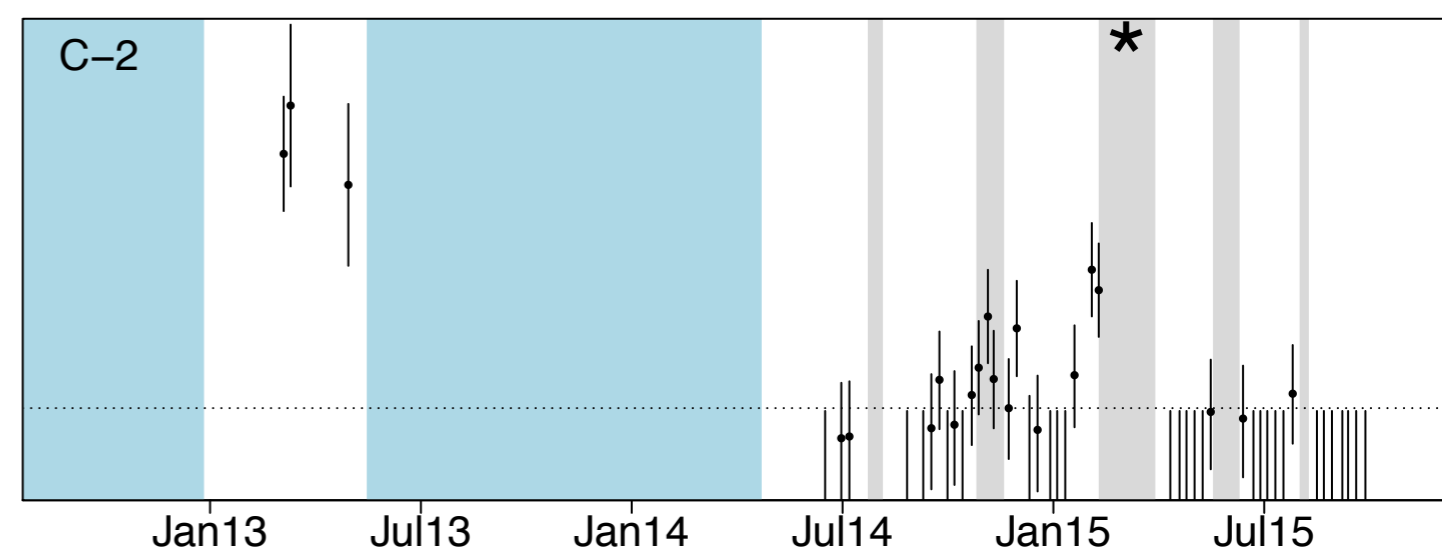

Date

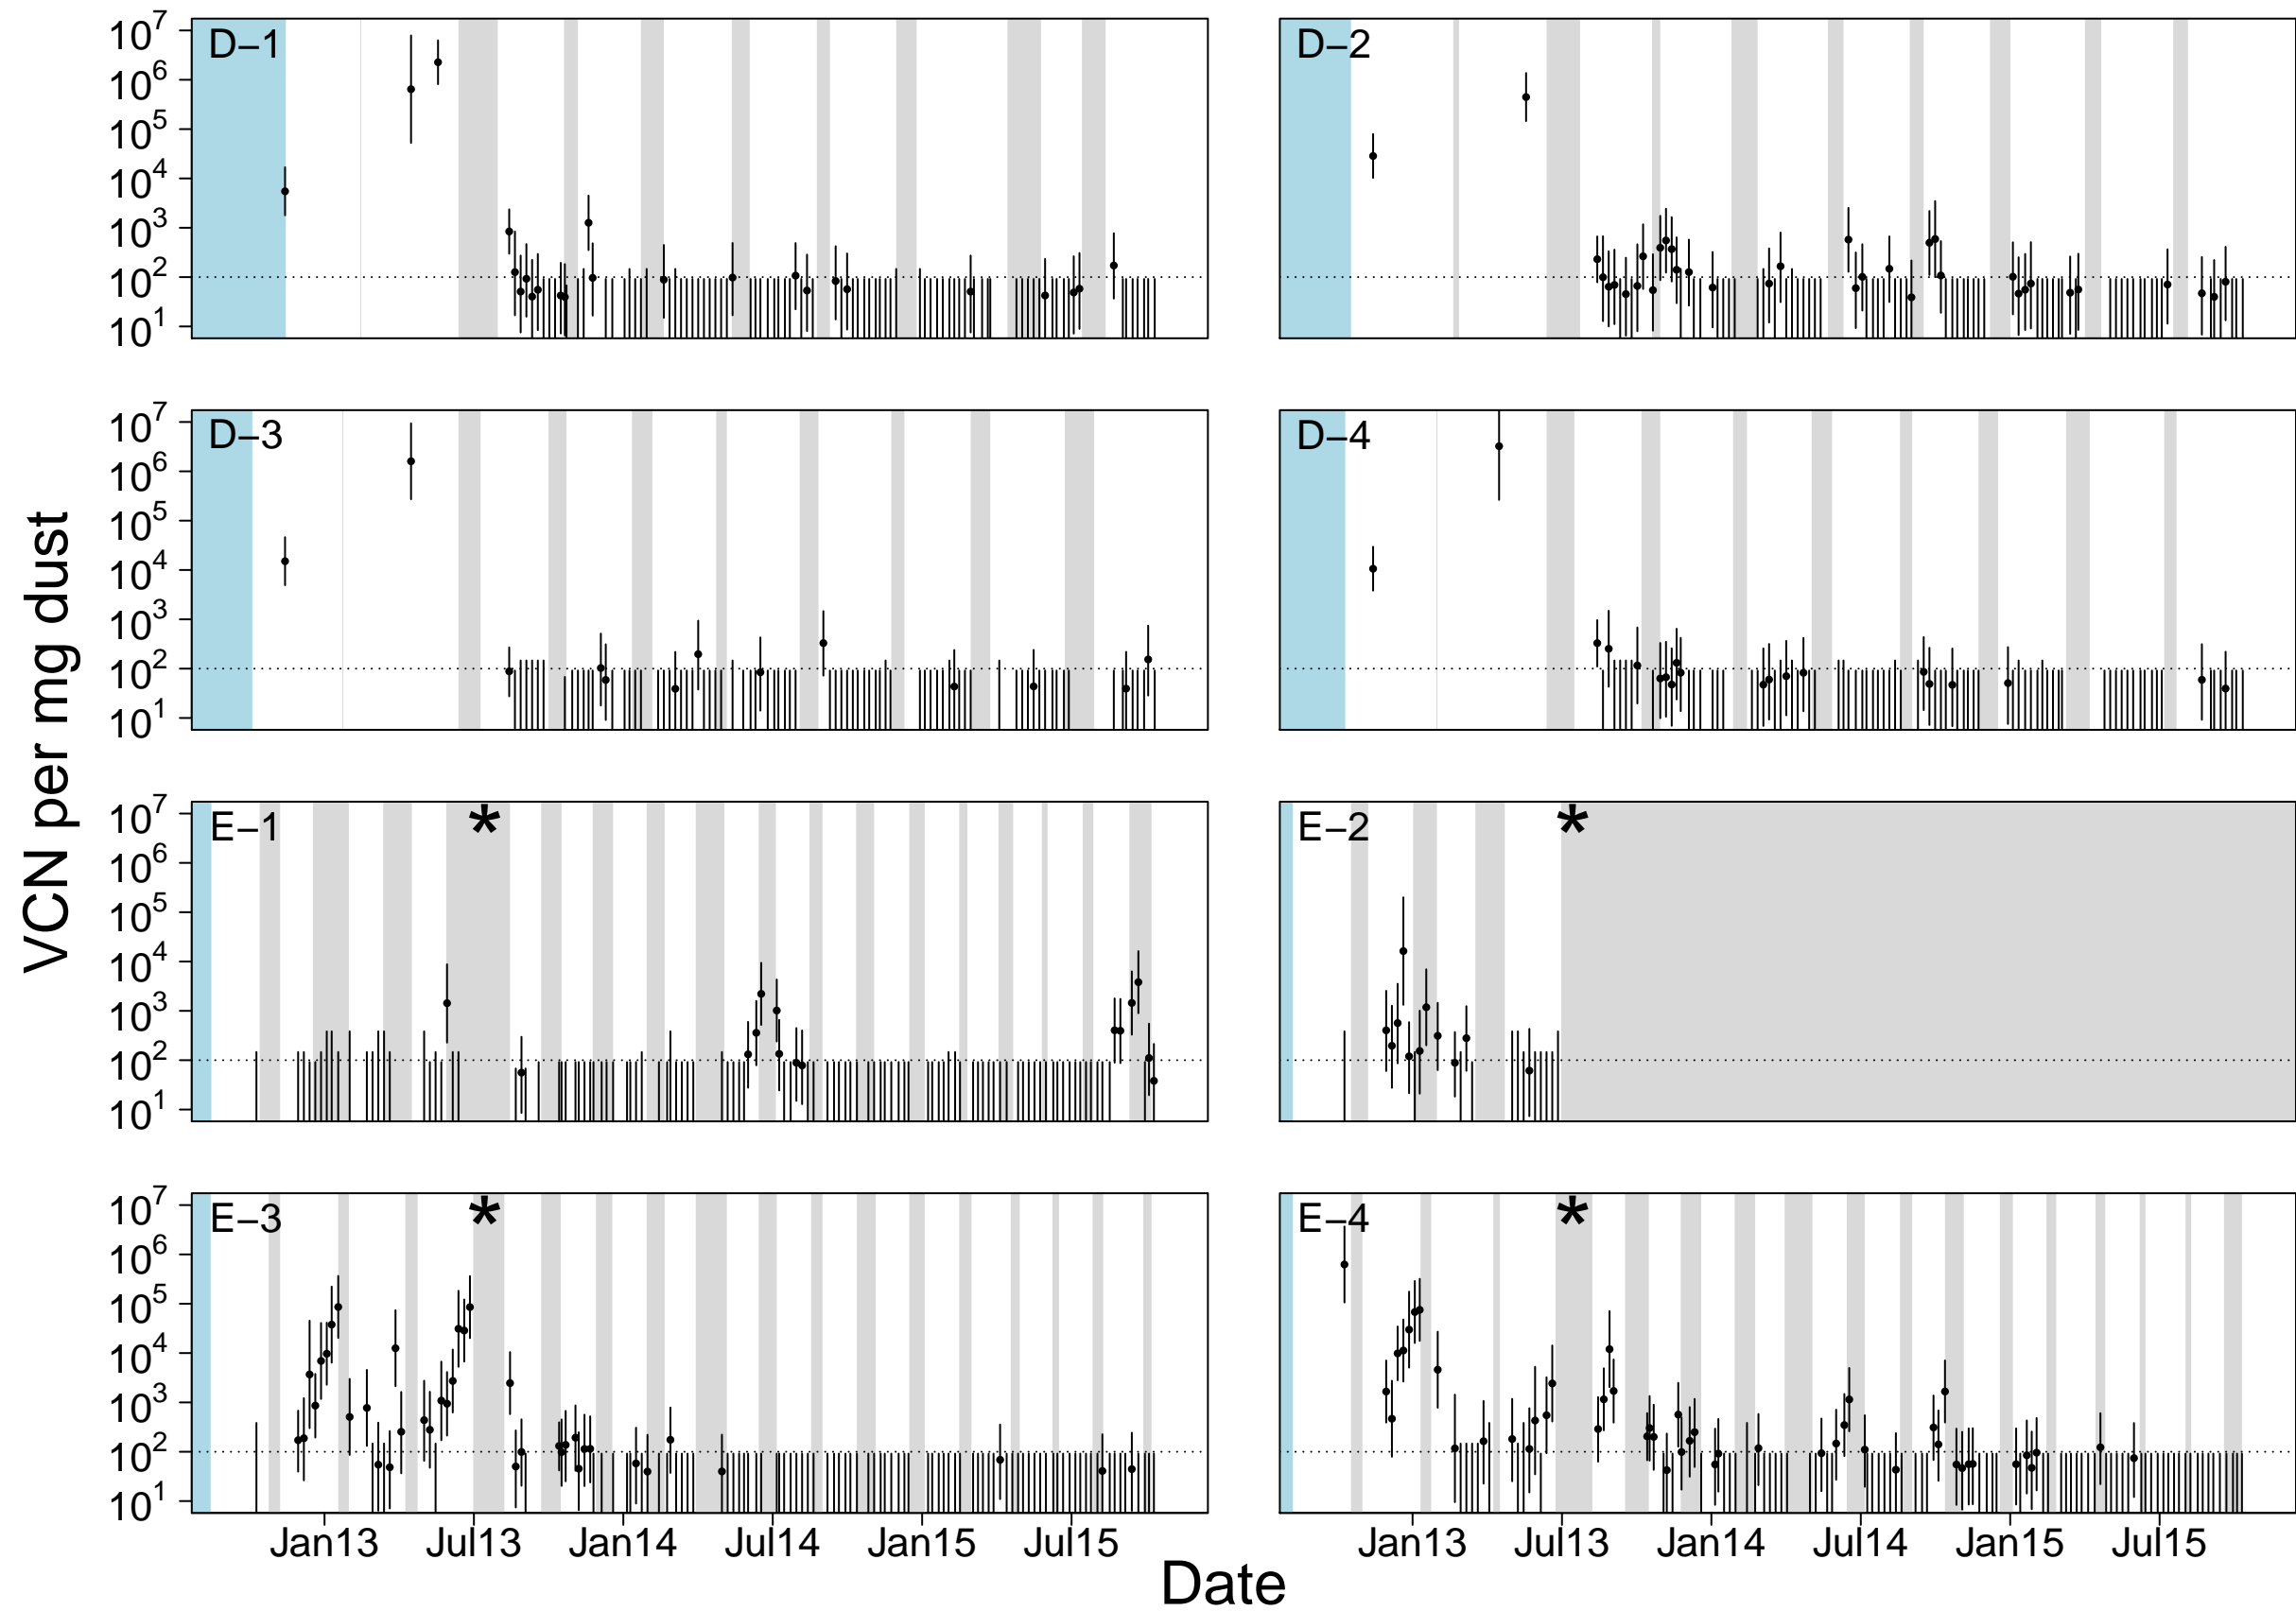

VCN per tube

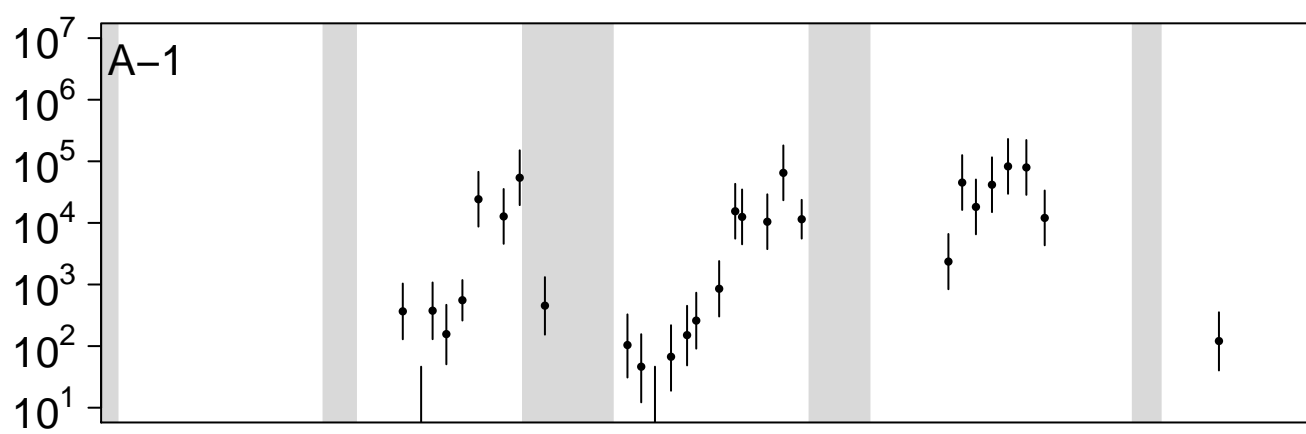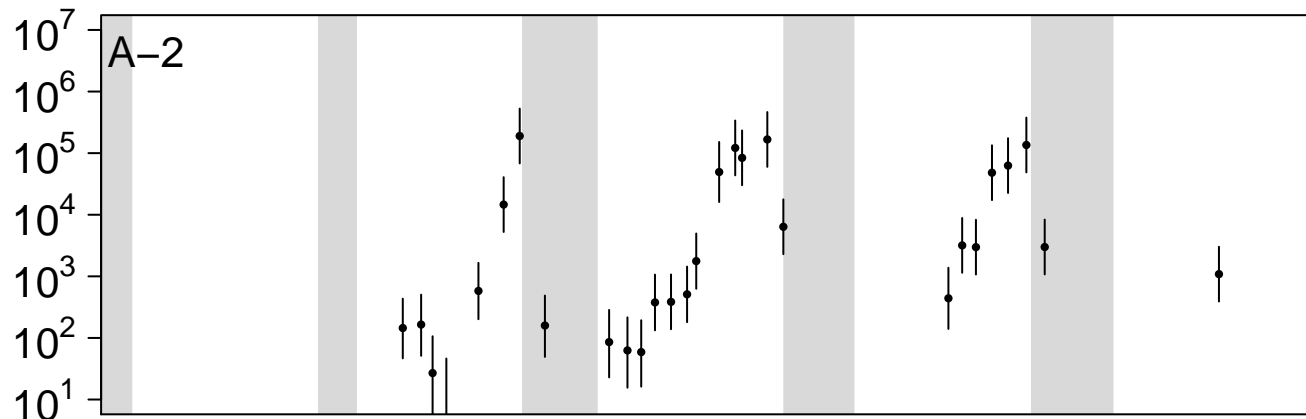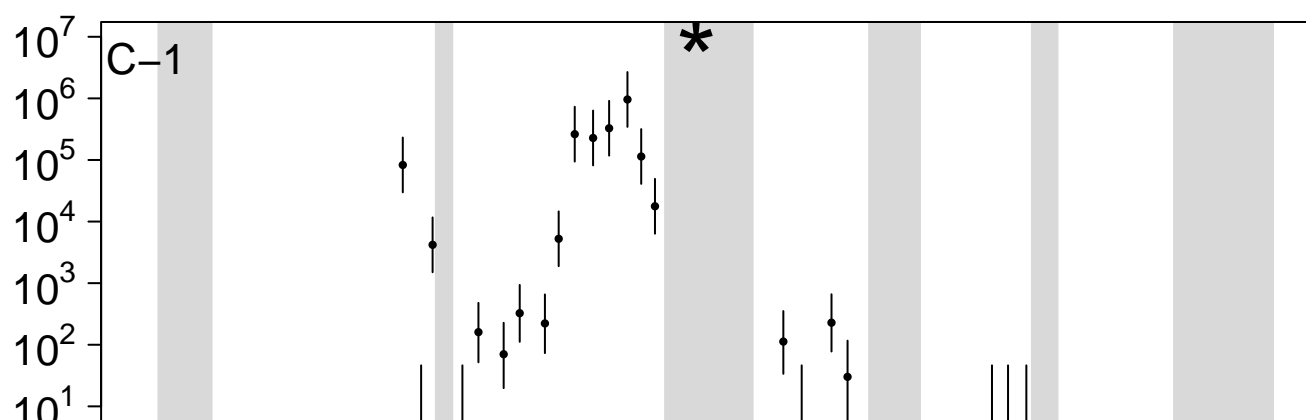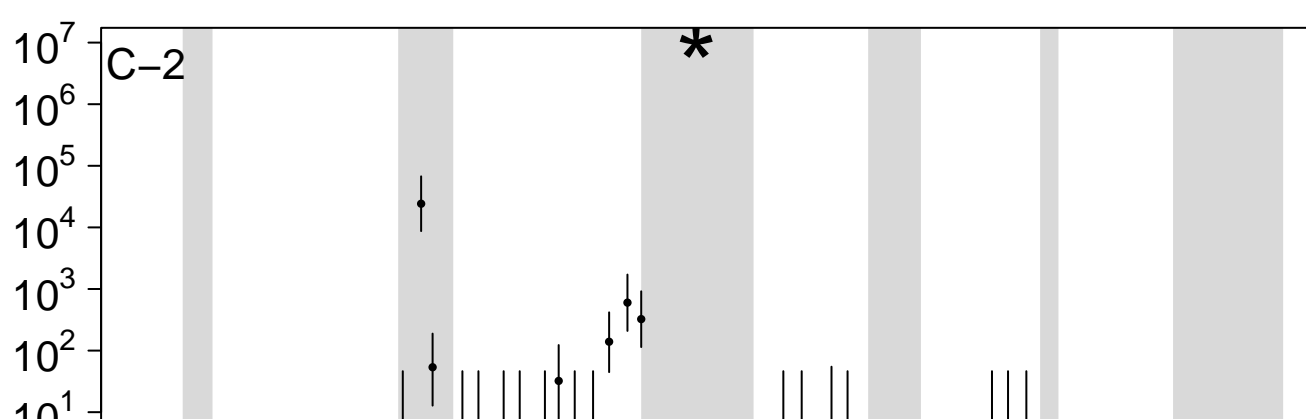

Jul14

Jan15

Jul15

Fraction of birds with detectable virus in feather tips

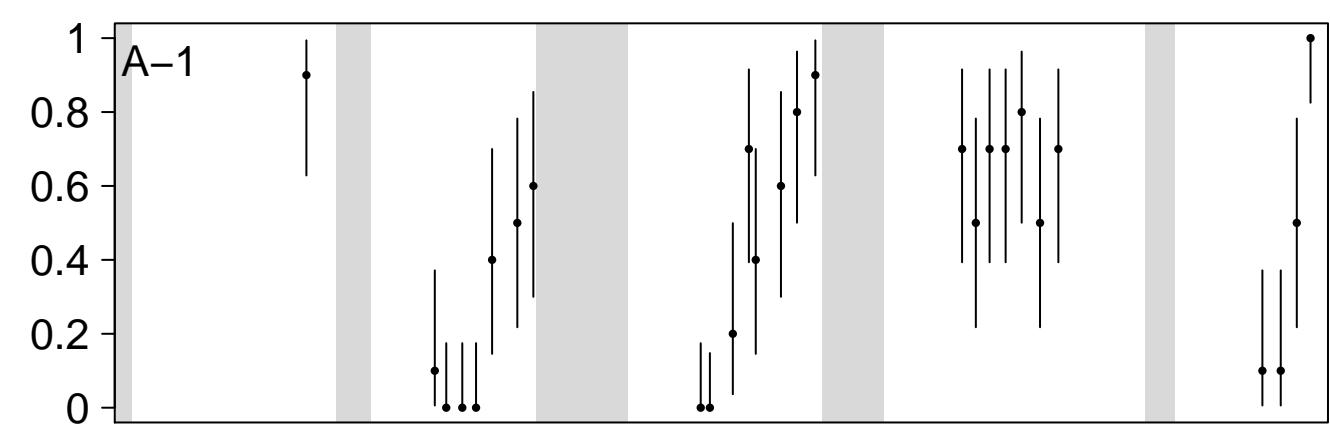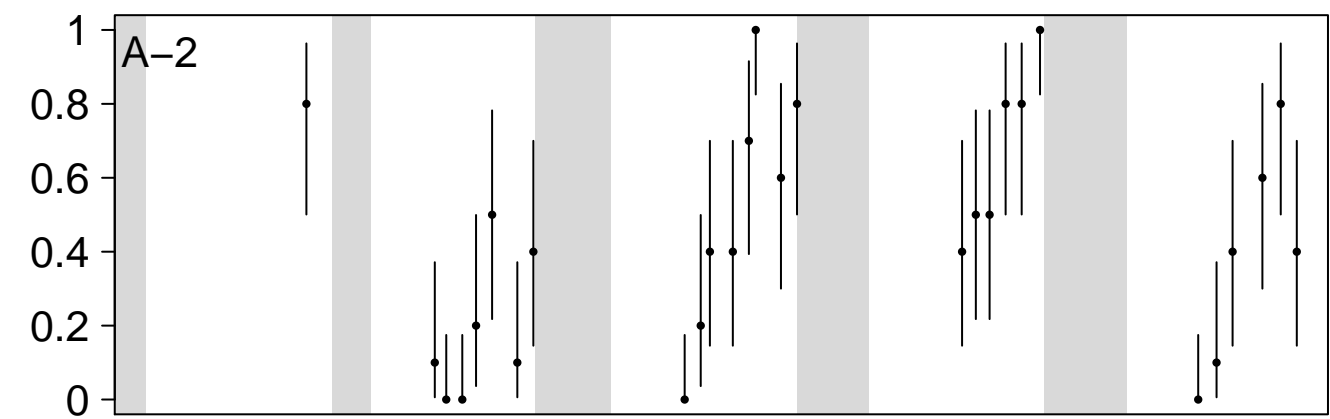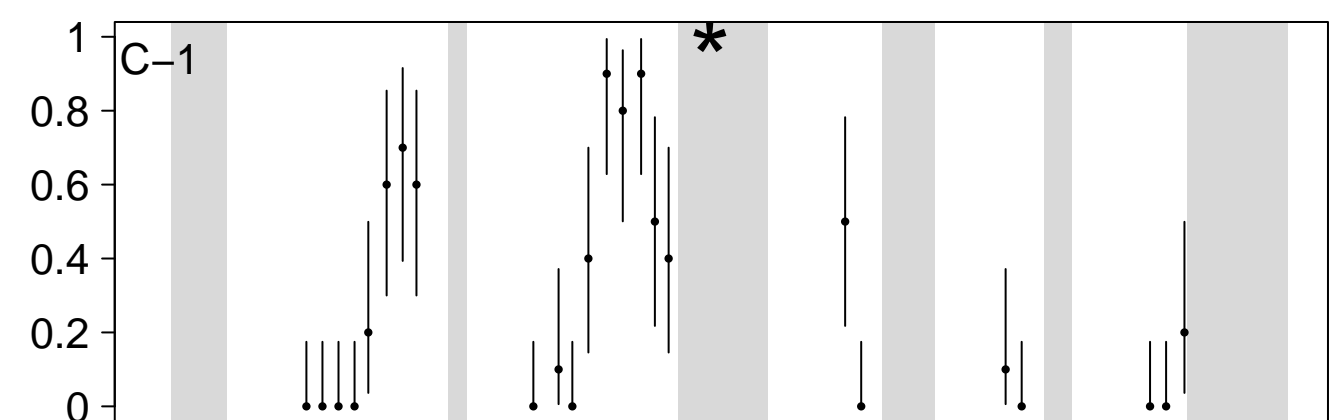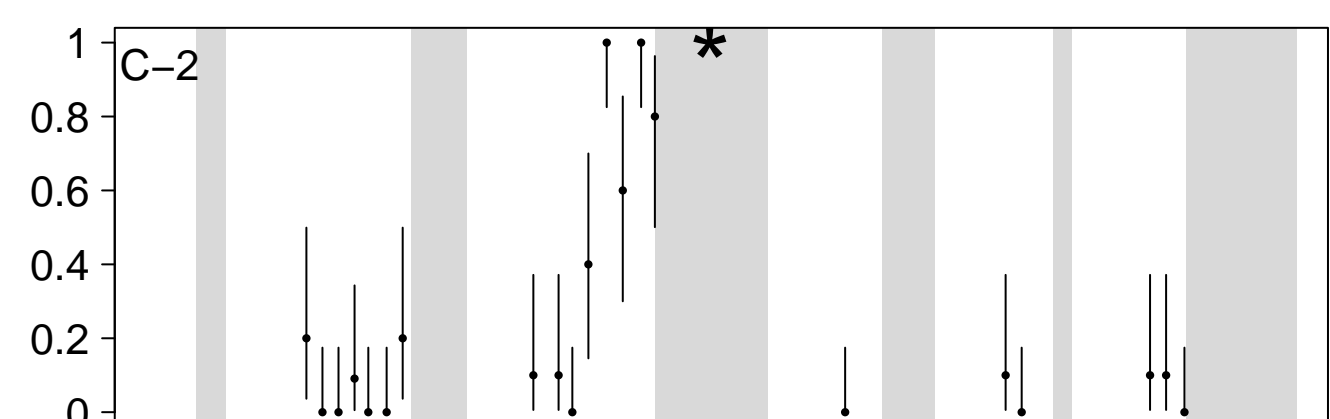

Jul14

Jan15

Jul15

| <b>Model name</b>  | <b>Mean deviance</b> | <b>Number of parameters</b> | <b>DIC</b>   | <b><math>\Delta</math>DIC</b> |
|--------------------|----------------------|-----------------------------|--------------|-------------------------------|
| <b>Full model</b>  | <b>336.9</b>         | <b>17</b>                   | <b>494.5</b> | <b>0</b>                      |
| No production type | 339.7                | 15                          | 497.1        | 2.5                           |
| No bird age        | 345.8                | 15                          | 503.7        | 9.1                           |
| No collection date | 341.2                | 10                          | 499.1        | 4.6                           |
| No sample          | 450.1                | 16                          | 575.3        | 80.7                          |
